# Supplementary material for: Bimetallic uranyl/cobalt(ii) isothiocyanates: structure, property and spectroscopic analysis of homo- and heterometallic phases
Source: Royal Society of Chemistry journal article supplement (doi:10.1039/d1dt01464a), 2021-01-01
Supplement: d1dt01464a2.pdf [file d1dt01464a2.pdf]

Electronic Supporting Information (ESI)

for

**Bimetallic Uranyl/Cobalt(II) Isothiocyanates: Structure, Property  
and Spectroscopic Analysis of Homo- and Heterometallic Phases**

Nicole M. Byrne,<sup>a</sup> Mark H. Schofield,<sup>a</sup> Aaron D. Nicholas,<sup>a</sup> Christopher L. Cahill<sup>a\*</sup>

<sup>a</sup>Department of Chemistry, The George Washington University, 800 22<sup>nd</sup> St. NW, Suite 4000, Washington,  
D.C., 20052

**Table of Contents**

|                   |                                                       |    |
|-------------------|-------------------------------------------------------|----|
| <b>Table S1</b>   | Crystallography table for compounds <b>1-3</b> .....  | 03 |
| <b>Figure S1</b>  | ORTEP drawing of compound <b>1</b> .....              | 04 |
| <b>Table S2</b>   | Bond distances and angles for compound <b>1</b> ..... | 05 |
| <b>Figure S2</b>  | ORTEP drawing of compound <b>2</b> .....              | 06 |
| <b>Table S3</b>   | Bond distances and angles for compound <b>2</b> ..... | 07 |
| <b>Figure S3</b>  | ORTEP drawing of compound <b>3</b> .....              | 08 |
| <b>Table S4</b>   | Bond distances and angles for compound <b>3</b> ..... | 09 |
|                   | Synthetic procedure for compounds <b>4-7</b> .....    | 10 |
| <b>Table S5</b>   | Crystallography table for compounds <b>4-7</b> .....  | 12 |
| <b>Figure S4</b>  | ORTEP drawing of compound <b>4</b> .....              | 13 |
| <b>Table S6</b>   | Bond distances and angles for compound <b>4</b> ..... | 14 |
| <b>Figure S5</b>  | ORTEP drawing of compound <b>5</b> .....              | 15 |
| <b>Table S7</b>   | Bond distances and angles for compound <b>5</b> ..... | 16 |
| <b>Figure S6</b>  | ORTEP drawing of compound <b>6</b> .....              | 17 |
| <b>Table S8</b>   | Bond distances and angles for compound <b>6</b> ..... | 18 |
| <b>Figure S7</b>  | ORTEP drawing of compound <b>7</b> .....              | 19 |
| <b>Table S9</b>   | Bond distances and angles for compound <b>7</b> ..... | 20 |
| <b>Figure S8</b>  | PXRD data for compounds <b>1</b> and <b>7</b> .....   | 21 |
| <b>Figure S9</b>  | PXRD data for compound <b>2</b> .....                 | 22 |
| <b>Figure S10</b> | PXRD data for compound <b>3</b> .....                 | 23 |
| <b>Figure S11</b> | PXRD data for compound <b>4</b> .....                 | 24 |
| <b>Figure S12</b> | PXRD data for compound <b>5</b> .....                 | 25 |
| <b>Figure S13</b> | PXRD data for compound <b>6</b> .....                 | 26 |
| <b>Figure S14</b> | UV-Vis spectra for compound <b>1</b> .....            | 27 |
| <b>Figure S15</b> | UV-Vis spectra for compound <b>2</b> .....            | 28 |
| <b>Figure S16</b> | UV-Vis spectra for compound <b>3</b> .....            | 39 |
| <b>Figure S17</b> | Raman spectra for compound <b>1</b> .....             | 30 |

|                   |                                                                                              |    |
|-------------------|----------------------------------------------------------------------------------------------|----|
| <b>Figure S18</b> | Raman spectra for compound <b>3</b> .....                                                    | 31 |
| <b>Figure S19</b> | Calculated Raman for Model A and Model B.....                                                | 32 |
| <b>Table S10</b>  | Calculated frequencies and atomic displacements for Model A.....                             | 33 |
| <b>Table S11</b>  | Calculated frequencies and atomic displacements for Model B.....                             | 35 |
| <b>Figure S20</b> | IR spectra for compound <b>1</b> .....                                                       | 38 |
| <b>Figure S21</b> | IR spectra for compound <b>3</b> .....                                                       | 39 |
| <b>Figure S22</b> | HOMO and LUMO of geometry optimized $[\text{UO}_2(\text{NCS})_5]^{3-}$ anion.....            | 40 |
| <b>Figure S23</b> | HOMO and LUMO of geometry optimized $[\text{Co}(\text{NCS})_4]^{2-}$ anion.....              | 41 |
| <b>Figure S24</b> | Model A with relevant atoms labeled.....                                                     | 42 |
| <b>Figure S25</b> | Model B with relevant atoms labeled.....                                                     | 43 |
| <b>Figure S26</b> | NLMO of U=O $\pi$ -bonding interaction.....                                                  | 44 |
| <b>Figure S27</b> | NLMO of second U=O $\pi$ -bonding interaction.....                                           | 45 |
| <b>Figure S28</b> | NLMO of U=O $\sigma$ -bonding interaction.....                                               | 46 |
| <b>Table S12</b>  | Stabilization energies of U=O bonding interactions.....                                      | 47 |
| <b>Table S13</b>  | Stabilization energies of S··S interactions.....                                             | 48 |
| <b>Table S14</b>  | Stabilization energies of S··O <sub>y1</sub> interactions.....                               | 49 |
| <b>Figure S29</b> | NLMOs of forward S··S interaction.....                                                       | 50 |
| <b>Figure S30</b> | NLMOs of reverse S··S interaction.....                                                       | 51 |
| <b>Figure S31</b> | NLMOs comprising forward S··O <sub>y1</sub> interaction.....                                 | 52 |
| <b>Figure S32</b> | NLMOs comprising reverse S··O <sub>y1</sub> interaction.....                                 | 53 |
| <b>Table S15</b>  | NBO analysis of U=O parent atom composition.....                                             | 54 |
| <b>Table S16</b>  | NBO analysis of U=O bond hybridization.....                                                  | 55 |
| <b>Table S17</b>  | Wiberg bond order analysis of U=O bonds.....                                                 | 56 |
| <b>Table S18</b>  | Wiberg bond order analysis of U-N bonds.....                                                 | 57 |
| <b>Table S19</b>  | Wiberg bond order analysis of all bonds within $[\text{UO}_2(\text{NCS})_5]^{3-}$ anion..... | 58 |
| <b>Table S20</b>  | Method validation across functionals for Model A.....                                        | 59 |
| <b>Table S21</b>  | Method validation across functionals for Model B.....                                        | 60 |
|                   | References.....                                                                              | 61 |

**Table S1:** Crystallography table for compounds **1-3**.

|                            | <b>1</b>                                                                              | <b>2</b>                                                                | <b>3</b>                                                                                                     |
|----------------------------|---------------------------------------------------------------------------------------|-------------------------------------------------------------------------|--------------------------------------------------------------------------------------------------------------|
| Chemical Formula           | (C <sub>4</sub> H <sub>12</sub> N) <sub>3</sub> [UO <sub>2</sub> (NCS) <sub>5</sub> ] | (C <sub>4</sub> H <sub>12</sub> N) <sub>2</sub> [Co(NCS) <sub>4</sub> ] | (C <sub>4</sub> H <sub>12</sub> N) <sub>5</sub> [UO <sub>2</sub> (NCS) <sub>5</sub> ][Co(NCS) <sub>4</sub> ] |
| Formula Weight (g/mol)     | 782.9                                                                                 | 439.5                                                                   | 1222.4                                                                                                       |
| Crystal System             | Monoclinic                                                                            | Triclinic                                                               | Monoclinic                                                                                                   |
| Space Group                | P2 <sub>1</sub> /c                                                                    | P-1                                                                     | P2 <sub>1</sub> /c                                                                                           |
| <i>a</i> (Å)               | 16.377(1)                                                                             | 11.104(2)                                                               | 16.828(1)                                                                                                    |
| <i>b</i> (Å)               | 9.279(1)                                                                              | 13.285(2)                                                               | 14.910(1)                                                                                                    |
| <i>c</i> (Å)               | 20.365(2)                                                                             | 24.380(4)                                                               | 21.455(2)                                                                                                    |
| $\alpha$ (°)               | 90                                                                                    | 95.465(5)                                                               | 90                                                                                                           |
| $\beta$ (°)                | 97.732(3)                                                                             | 90.187(6)                                                               | 102.888(3)                                                                                                   |
| $\gamma$ (°)               | 90                                                                                    | 114.197(5)                                                              | 90                                                                                                           |
| <i>V</i> (Å <sup>3</sup> ) | 3066.5(5)                                                                             | 3261.8(8)                                                               | 5247.0(7)                                                                                                    |
| <i>Z</i>                   | 4                                                                                     | 6                                                                       | 4                                                                                                            |
| <i>T</i> (K)               | 100(2)                                                                                | 100(2)                                                                  | 100(2)                                                                                                       |
| $\lambda$ (Mo K $\alpha$ ) | 0.71073                                                                               | 0.71073                                                                 | 0.71073                                                                                                      |
| $\mu$ (mm <sup>-1</sup> )  | 5.661                                                                                 | 1.179                                                                   | 3.797                                                                                                        |
| <i>R</i> <sub>int</sub>    | 0.0867                                                                                | 0.0392                                                                  | 0.0904                                                                                                       |
| <i>R</i> <sub>1</sub>      | 0.0231                                                                                | 0.0344                                                                  | 0.0379                                                                                                       |
| w <i>R</i> <sub>2</sub>    | 0.0429                                                                                | 0.0831                                                                  | 0.0973                                                                                                       |

**Figure S1:** ORTEP drawing of compound **1**,  $(C_4H_{12}N)_3[UO_2(NCS)_5]$ .

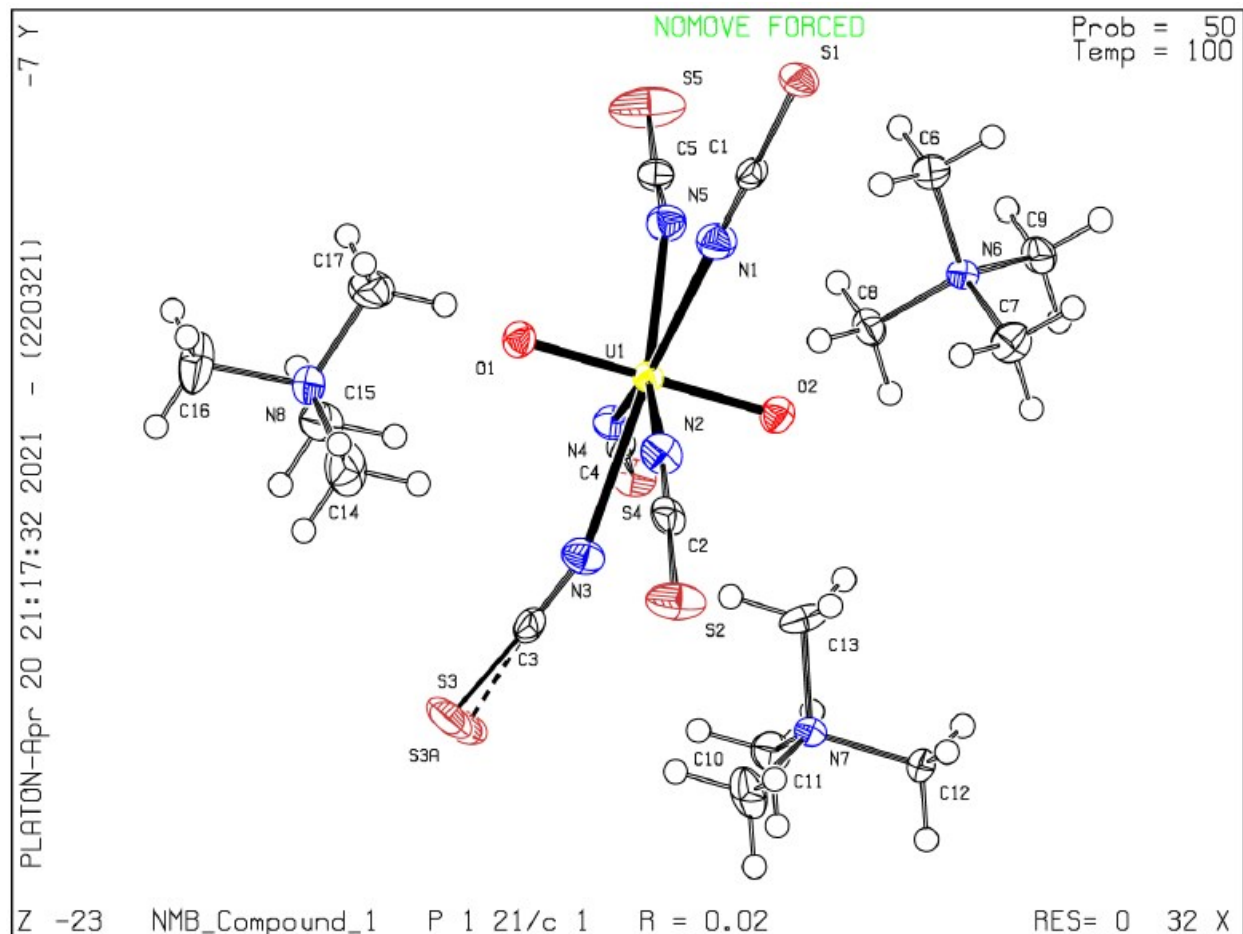

**Table S2:** Bond distances and angles for compound **1**, (C<sub>4</sub>H<sub>12</sub>N)<sub>3</sub>[UO<sub>2</sub>(NCS)<sub>5</sub>]

| Atom 1-Atom 2 | Bond Length (Å) | Atom 1-Atom 2-Atom 3 | Bond Angle (°) |
|---------------|-----------------|----------------------|----------------|
| U(1)-O(1)     | 1.765(2)        | O(1)-U(1)-O(2)       | 179.81(11)     |
| U(1)-O(2)     | 1.768(2)        | O(1)-U(1)-N(5)       | 88.52(10)      |
| U(1)-N(5)     | 2.421(3)        | O(2)-U(1)-N(5)       | 91.29(10)      |
| U(1)-N(2)     | 2.424(3)        | O(1)-U(1)-N(2)       | 90.47(10)      |
| U(1)-N(1)     | 2.446(3)        | O(2)-U(1)-N(2)       | 89.69(10)      |
| U(1)-N(3)     | 2.458(3)        | N(5)-U(1)-N(2)       | 147.46(9)      |
| U(1)-N(4)     | 2.482(3)        | O(1)-U(1)-N(1)       | 91.76(10)      |
| S(4)-C(4)     | 1.629(3)        | O(2)-U(1)-N(1)       | 88.18(10)      |
| S(1)-C(1)     | 1.622(3)        | N(5)-U(1)-N(1)       | 73.65(9)       |
| S(5)-C(5)     | 1.616(4)        | N(2)-U(1)-N(1)       | 73.87(9)       |
| N(6)-C(7)     | 1.492(4)        | O(1)-U(1)-N(3)       | 87.06(10)      |
| N(6)-C(9)     | 1.495(4)        | O(2)-U(1)-N(3)       | 93.10(10)      |
| N(6)-C(8)     | 1.498(4)        | N(5)-U(1)-N(3)       | 140.24(9)      |
| N(6)-C(6)     | 1.499(4)        | N(2)-U(1)-N(3)       | 72.11(9)       |
| N(7)-C(10)    | 1.492(4)        | N(1)-U(1)-N(3)       | 145.95(9)      |
| N(7)-C(11)    | 1.493(4)        | O(1)-U(1)-N(4)       | 93.92(9)       |
| N(7)-C(13)    | 1.495(4)        | O(2)-U(1)-N(4)       | 86.03(9)       |
| N(7)-C(12)    | 1.498(4)        | N(5)-U(1)-N(4)       | 70.69(9)       |
| N(8)-C(17)    | 1.491(4)        | N(2)-U(1)-N(4)       | 141.77(9)      |
| N(8)-C(15)    | 1.493(4)        | N(1)-U(1)-N(4)       | 143.70(9)      |
| N(8)-C(14)    | 1.493(5)        | N(3)-U(1)-N(4)       | 70.23(9)       |
| N(8)-C(16)    | 1.497(4)        | C(7)-N(6)-C(9)       | 109.6(2)       |
| N(2)-C(2)     | 1.167(4)        | C(7)-N(6)-C(8)       | 109.6(3)       |
| N(4)-C(4)     | 1.165(4)        | C(9)-N(6)-C(8)       | 108.9(2)       |
| N(3)-C(3)     | 1.149(4)        | C(7)-N(6)-C(6)       | 109.9(2)       |
| N(1)-C(1)     | 1.160(4)        | C(9)-N(6)-C(6)       | 109.5(2)       |
| N(5)-C(5)     | 1.152(4)        | C(8)-N(6)-C(6)       | 109.4(2)       |
| C(3)-S(3)     | 1.588(6)        | C(10)-N(7)-C(11)     | 110.1(3)       |
| C(3)-S(3A)    | 1.702(8)        | C(10)-N(7)-C(13)     | 110.0(3)       |
| C(2)-S(2)     | 1.615(4)        | C(11)-N(7)-C(13)     | 109.7(3)       |
|               |                 | C(10)-N(7)-C(12)     | 108.7(3)       |
|               |                 | C(11)-N(7)-C(12)     | 109.4(3)       |
|               |                 | C(13)-N(7)-C(12)     | 109.0(2)       |
|               |                 | C(17)-N(8)-C(15)     | 108.4(3)       |
|               |                 | C(17)-N(8)-C(14)     | 110.2(3)       |
|               |                 | C(15)-N(8)-C(14)     | 108.8(3)       |
|               |                 | C(17)-N(8)-C(16)     | 110.5(3)       |
|               |                 | C(15)-N(8)-C(16)     | 108.5(3)       |
|               |                 | C(14)-N(8)-C(16)     | 110.4(3)       |
|               |                 | C(2)-N(2)-U(1)       | 160.5(3)       |
|               |                 | C(4)-N(4)-U(1)       | 163.3(2)       |
|               |                 | C(3)-N(3)-U(1)       | 160.3(3)       |
|               |                 | C(1)-N(1)-U(1)       | 176.3(3)       |
|               |                 | C(5)-N(5)-U(1)       | 154.2(3)       |
|               |                 | N(1)-C(1)-S(1)       | 178.8(3)       |
|               |                 | N(5)-C(5)-S(5)       | 177.2(3)       |
|               |                 | N(4)-C(4)-S(4)       | 179.8(3)       |
|               |                 | N(3)-C(3)-S(3)       | 171.2(13)      |
|               |                 | N(3)-C(3)-S(3A)      | 166.9(7)       |
|               |                 | N(2)-C(2)-S(2)       | 179.1(3)       |

**Figure S2:** ORTEP drawing of compound **2**,  $(C_4H_{12}N)_2[Co(NCS)_4]$ .

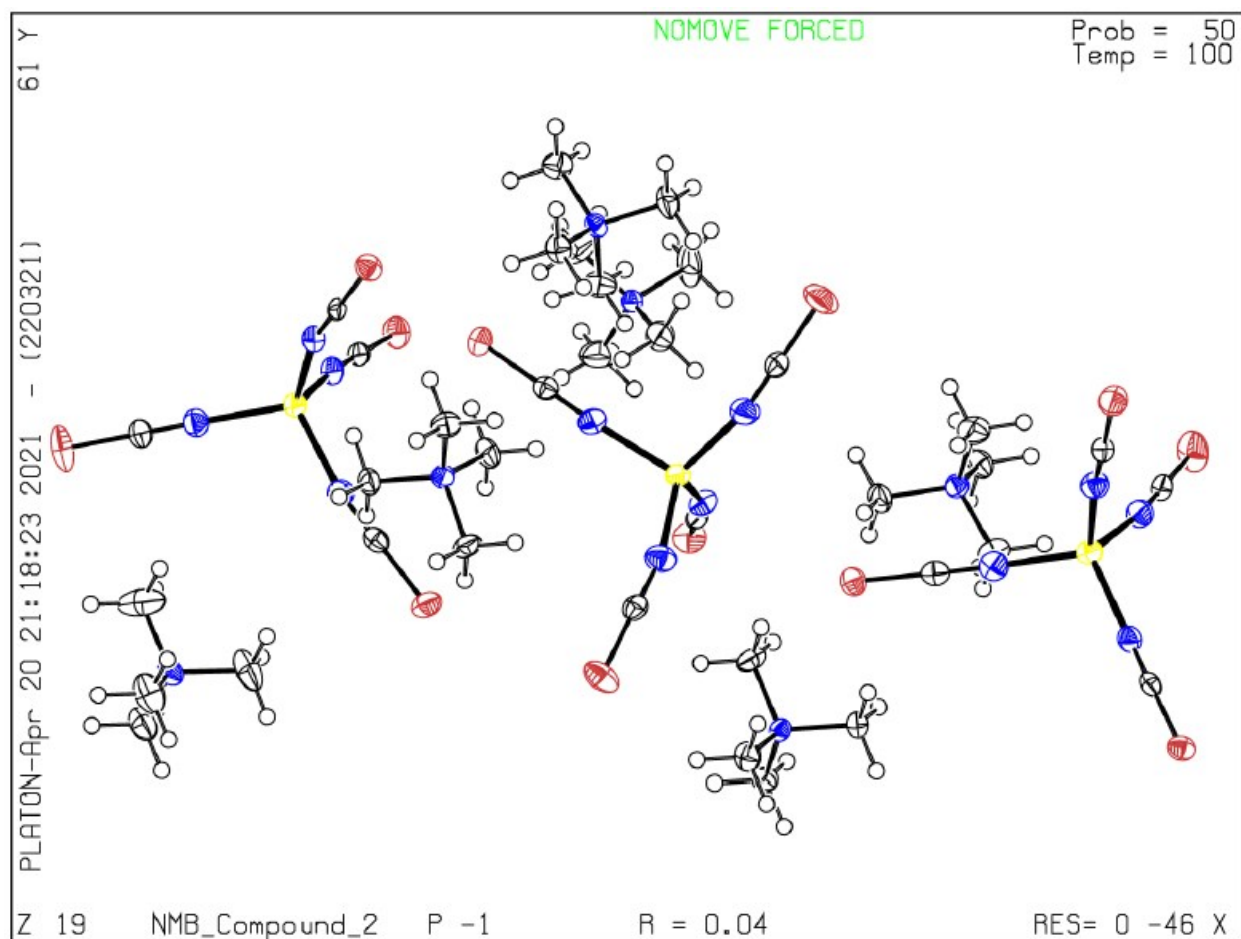

**Table S3:** Bond distances and angles for compound **2**, (C<sub>4</sub>H<sub>12</sub>N)<sub>2</sub>[Co(NCS)<sub>4</sub>].

| Atom 1-Atom 2 | Bond Length (Å) | Atom 1-Atom 2-Atom 3 | Bond Angle (°) |
|---------------|-----------------|----------------------|----------------|
| Co(2)-N(6)    | 1.928(3)        | N(6)-Co(2)-N(8)      | 115.15(12)     |
| Co(2)-N(8)    | 1.935(3)        | N(6)-Co(2)-N(5)      | 113.01(13)     |
| Co(2)-N(5)    | 1.960(3)        | N(8)-Co(2)-N(5)      | 107.82(12)     |
| Co(2)-N(7)    | 1.963(3)        | N(6)-Co(2)-N(7)      | 106.60(12)     |
| Co(3)-N(9)    | 1.960(3)        | N(8)-Co(2)-N(7)      | 111.07(13)     |
| Co(3)-N(11)   | 1.964(3)        | N(5)-Co(2)-N(7)      | 102.49(10)     |
| Co(3)-N(10)   | 1.968(3)        | N(9)-Co(3)-N(11)     | 107.10(12)     |
| Co(3)-N(12)   | 1.976(3)        | N(9)-Co(3)-N(10)     | 115.43(11)     |
| Co(1)-N(3)    | 1.957(3)        | N(11)-Co(3)-N(10)    | 109.14(12)     |
| Co(1)-N(1)    | 1.966(3)        | N(9)-Co(3)-N(12)     | 111.65(12)     |
| Co(1)-N(2)    | 1.968(3)        | N(11)-Co(3)-N(12)    | 109.53(12)     |
| Co(1)-N(4)    | 1.970(3)        | N(10)-Co(3)-N(12)    | 103.90(12)     |
| S(1)-C(1)     | 1.626(3)        | N(3)-Co(1)-N(1)      | 105.48(12)     |
| S(9)-C(9)     | 1.625(4)        | N(3)-Co(1)-N(2)      | 108.85(12)     |
| S(4)-C(4)     | 1.628(4)        | N(1)-Co(1)-N(2)      | 114.07(11)     |
| S(11)-C(11)   | 1.624(3)        | N(3)-Co(1)-N(4)      | 112.72(12)     |
| S(12)-C(12)   | 1.630(4)        | N(1)-Co(1)-N(4)      | 111.52(12)     |
| S(3)-C(3)     | 1.618(3)        | N(2)-Co(1)-N(4)      | 104.35(12)     |
| S(5)-C(5)     | 1.623(4)        | C(21)-N(15)-C(24)    | 109.9(2)       |
| S(7)-C(7)     | 1.622(3)        | C(23)-N(15)-C(24)    | 109.2(2)       |
| S(2)-C(2)     | 1.621(4)        | C(5)-N(5)-Co(2)      | 159.9(3)       |
| S(10)-C(10)   | 1.622(3)        | C(1)-N(1)-Co(1)      | 165.9(3)       |
| S(8)-C(8)     | 1.614(3)        | C(12)-N(12)-Co(3)    | 174.2(3)       |
| S(6)-C(6)     | 1.616(4)        | C(7)-N(7)-Co(2)      | 168.5(3)       |
| N(14)-C(20)   | 1.487(5)        | C(9)-N(9)-Co(3)      | 165.0(3)       |
| N(14)-C(17)   | 1.491(4)        | C(2)-N(2)-Co(1)      | 171.8(3)       |
| N(14)-C(19)   | 1.491(4)        | C(4)-N(4)-Co(1)      | 174.4(3)       |
| N(14)-C(18)   | 1.492(4)        | C(3)-N(3)-Co(1)      | 173.3(3)       |
| N(5)-C(5)     | 1.156(4)        | C(8)-N(8)-Co(2)      | 164.2(3)       |
| N(1)-C(1)     | 1.169(4)        | C(11)-N(11)-Co(3)    | 170.5(3)       |
| N(13)-C(16)   | 1.493(4)        | C(10)-N(10)-Co(3)    | 171.6(3)       |
| N(13)-C(13)   | 1.496(4)        | C(25)-N(16)-C(27)    | 109.5(3)       |
| N(13)-C(15)   | 1.498(4)        | C(6)-N(6)-Co(2)      | 168.1(3)       |
| N(13)-C(14)   | 1.499(4)        | N(7)-C(7)-S(7)       | 178.5(3)       |
| N(12)-C(12)   | 1.165(4)        | N(11)-C(11)-S(11)    | 179.1(3)       |
| N(7)-C(7)     | 1.163(4)        | N(4)-C(4)-S(4)       | 178.7(3)       |
| N(9)-C(9)     | 1.161(4)        | N(1)-C(1)-S(1)       | 178.5(3)       |
| N(2)-C(2)     | 1.161(4)        | N(8)-C(8)-S(8)       | 179.0(3)       |
| N(4)-C(4)     | 1.167(4)        | N(9)-C(9)-S(9)       | 179.0(3)       |
| N(3)-C(3)     | 1.160(4)        | N(3)-C(3)-S(3)       | 179.2(3)       |
| N(8)-C(8)     | 1.158(4)        | N(2)-C(2)-S(2)       | 179.6(3)       |
| N(11)-C(11)   | 1.165(4)        | N(5)-C(5)-S(5)       | 178.9(3)       |
| N(10)-C(10)   | 1.151(4)        | N(12)-C(12)-S(12)    | 178.9(3)       |
| N(16)-C(25)   | 1.475(5)        | N(6)-C(6)-S(6)       | 178.6(4)       |
| N(6)-C(6)     | 1.150(4)        | N(10)-C(10)-S(10)    | 179.4(3)       |

**Figure S3:** ORTEP drawing of compound **3**,  $(C_4H_{12}N)_5[Co(NCS)_4][UO_2(NCS)_5]$ .

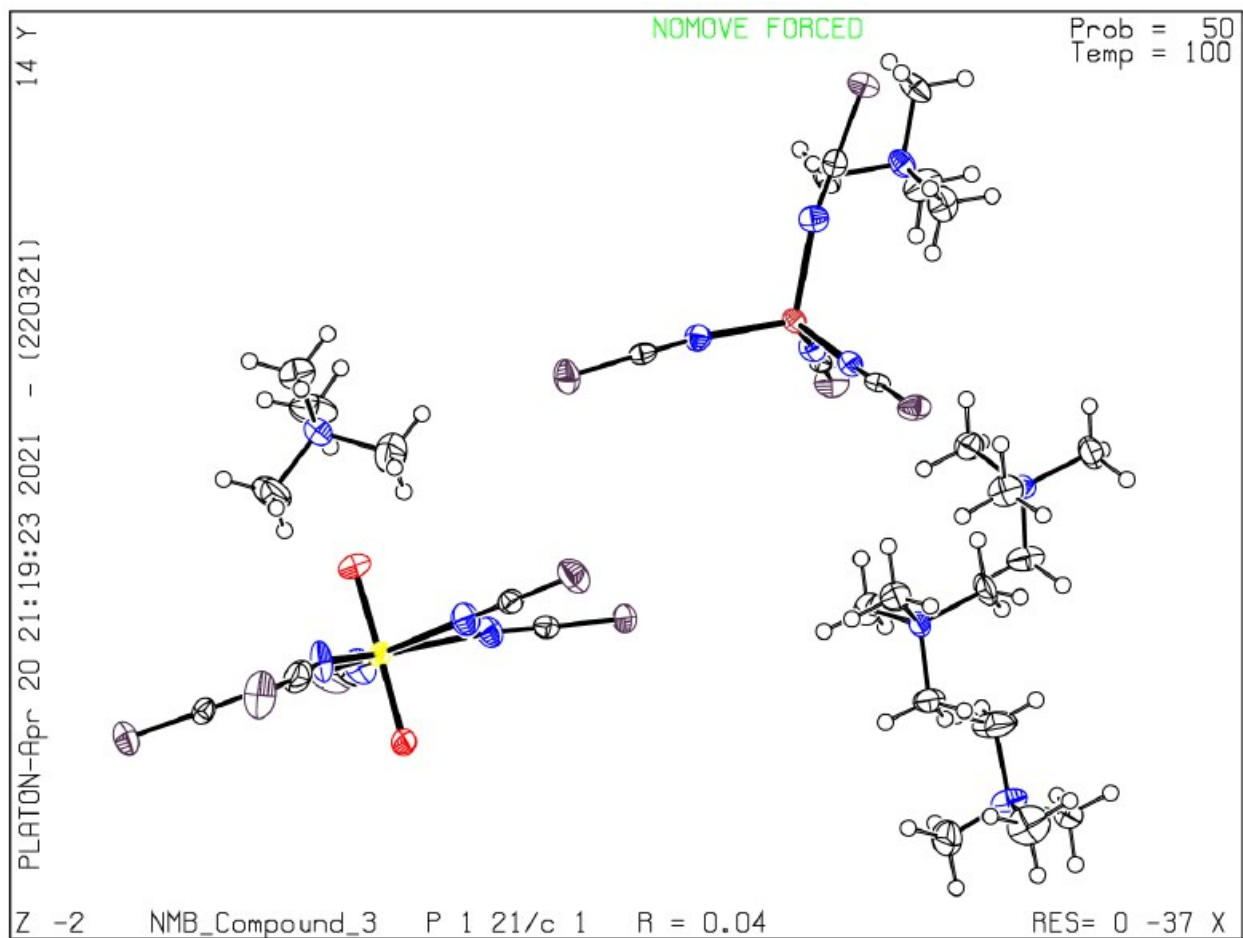



**Table S4:** Bond distances and angles for compound **3**, (C<sub>4</sub>H<sub>12</sub>N)<sub>5</sub>[Co(NCS)<sub>4</sub>][UO<sub>2</sub>(NCS)<sub>5</sub>].

| Atom 1-<br>Atom 2 | Bond Length<br>(Å) | Atom 1-Atom 2-<br>Atom 3 | Bond Angle<br>(°) | Atom 1-Atom 2-<br>Atom 3 | Bond Angle<br>(°) |
|-------------------|--------------------|--------------------------|-------------------|--------------------------|-------------------|
| U(1)-O(1)         | 1.766(4)           | O(1)-U(1)-O(2)           | 179.01(18)        | C(12)-N(10)-C(11)        | 110.0(5)          |
| U(1)-O(2)         | 1.774(4)           | O(1)-U(1)-N(5)           | 90.95(18)         | C(13)-N(10)-C(10)        | 109.8(5)          |
| U(1)-N(5)         | 2.420(5)           | O(2)-U(1)-N(5)           | 88.54(19)         | C(12)-N(10)-C(10)        | 108.8(5)          |
| U(1)-N(3)         | 2.435(5)           | O(1)-U(1)-N(3)           | 92.14(17)         | C(11)-N(10)-C(10)        | 108.4(5)          |
| U(1)-N(4)         | 2.447(5)           | O(2)-U(1)-N(3)           | 88.77(18)         | C(7)-N(7)-Co(1)          | 169.4(4)          |
| U(1)-N(2)         | 2.480(4)           | N(5)-U(1)-N(3)           | 143.15(16)        | C(16)-N(11)-C(17)        | 110.2(4)          |
| U(1)-N(1)         | 2.487(5)           | O(1)-U(1)-N(4)           | 88.29(16)         | C(16)-N(11)-C(14)        | 108.9(4)          |
| C(3)-N(3)         | 1.160(7)           | O(2)-U(1)-N(4)           | 92.36(17)         | C(17)-N(11)-C(14)        | 109.6(4)          |
| C(3)-S(3)         | 1.617(6)           | N(5)-U(1)-N(4)           | 72.23(16)         | C(16)-N(11)-C(15)        | 109.2(4)          |
| Co(1)-N(9)        | 1.948(5)           | N(3)-U(1)-N(4)           | 71.17(16)         | C(17)-N(11)-C(15)        | 109.3(5)          |
| Co(1)-N(6)        | 1.953(5)           | O(1)-U(1)-N(2)           | 90.05(17)         | C(14)-N(11)-C(15)        | 109.6(5)          |
| Co(1)-N(8)        | 1.957(4)           | O(2)-U(1)-N(2)           | 89.85(18)         | C(8)-N(8)-Co(1)          | 176.8(4)          |
| Co(1)-N(7)        | 1.974(5)           | N(5)-U(1)-N(2)           | 143.03(16)        | C(6)-N(6)-Co(1)          | 172.9(4)          |
| C(4)-N(4)         | 1.165(7)           | N(3)-U(1)-N(2)           | 73.70(15)         | C(9)-N(9)-Co(1)          | 168.6(4)          |
| C(4)-S(4)         | 1.627(5)           | N(4)-U(1)-N(2)           | 144.74(15)        | C(18)-N(14)-C(20)        | 109.0(5)          |
| C(5)-N(5)         | 1.104(7)           | O(1)-U(1)-N(1)           | 89.26(16)         | C(18)-N(14)-C(21)        | 109.8(5)          |
| C(5)-S(5)         | 1.644(7)           | O(2)-U(1)-N(1)           | 89.78(18)         | C(20)-N(14)-C(21)        | 109.6(5)          |
| S(8)-C(8)         | 1.618(5)           | N(5)-U(1)-N(1)           | 71.09(16)         | C(18)-N(14)-C(19)        | 109.3(4)          |
| C(1)-N(1)         | 1.157(7)           | N(3)-U(1)-N(1)           | 145.64(15)        | C(20)-N(14)-C(19)        | 109.2(5)          |
| C(1)-S(1)         | 1.626(5)           | N(4)-U(1)-N(1)           | 143.18(16)        | C(21)-N(14)-C(19)        | 109.8(5)          |
| S(9)-C(9)         | 1.621(6)           | N(2)-U(1)-N(1)           | 71.97(15)         | N(6)-C(6)-S(6)           | 179.1(5)          |
| S(6)-C(6)         | 1.616(5)           | N(3)-C(3)-S(3)           | 179.2(6)          | N(9)-C(9)-S(9)           | 178.9(5)          |
| S(7)-C(7)         | 1.632(6)           | N(9)-Co(1)-N(6)          | 106.94(18)        | N(8)-C(8)-S(8)           | 179.5(5)          |
| N(12)-C(23)       | 1.484(7)           | N(9)-Co(1)-N(8)          | 117.38(19)        | N(7)-C(7)-S(7)           | 179.6(5)          |
| N(12)-C(24)       | 1.488(7)           | N(6)-Co(1)-N(8)          | 110.35(19)        | C(2)-N(2)-U(1)           | 168.0(5)          |
| N(12)-C(22)       | 1.493(7)           | N(9)-Co(1)-N(7)          | 105.55(19)        | N(2)-C(2)-S(2)           | 176.7(6)          |
| N(12)-C(25)       | 1.506(7)           | N(6)-Co(1)-N(7)          | 109.60(19)        |                          |                   |
| N(13)-C(29)       | 1.491(7)           | N(8)-Co(1)-N(7)          | 106.77(18)        |                          |                   |
| N(13)-C(28)       | 1.492(7)           | N(4)-C(4)-S(4)           | 178.7(5)          |                          |                   |
| N(13)-C(26)       | 1.493(7)           | C(3)-N(3)-U(1)           | 172.7(4)          |                          |                   |
| N(13)-C(27)       | 1.494(7)           | N(5)-C(5)-S(5)           | 177.6(7)          |                          |                   |
| N(10)-C(13)       | 1.472(8)           | C(4)-N(4)-U(1)           | 170.1(4)          |                          |                   |
| N(10)-C(12)       | 1.495(8)           | N(1)-C(1)-S(1)           | 178.6(5)          |                          |                   |
| N(10)-C(11)       | 1.496(8)           | C(5)-N(5)-U(1)           | 176.8(5)          |                          |                   |
| N(10)-C(10)       | 1.505(7)           | C(1)-N(1)-U(1)           | 174.2(4)          |                          |                   |
| N(7)-C(7)         | 1.162(7)           | C(23)-N(12)-C(24)        | 109.8(5)          |                          |                   |
| N(11)-C(16)       | 1.497(7)           | C(23)-N(12)-C(22)        | 109.3(4)          |                          |                   |
| N(11)-C(17)       | 1.498(7)           | C(24)-N(12)-C(22)        | 109.5(5)          |                          |                   |
| N(11)-C(14)       | 1.501(7)           | C(23)-N(12)-C(25)        | 109.6(4)          |                          |                   |
| N(11)-C(15)       | 1.502(7)           | C(24)-N(12)-C(25)        | 109.6(4)          |                          |                   |
| N(8)-C(8)         | 1.159(6)           | C(22)-N(12)-C(25)        | 109.1(5)          |                          |                   |
| N(6)-C(6)         | 1.164(7)           | C(29)-N(13)-C(28)        | 109.2(4)          |                          |                   |
| N(9)-C(9)         | 1.168(7)           | C(29)-N(13)-C(26)        | 110.8(4)          |                          |                   |
| N(14)-C(18)       | 1.475(8)           | C(28)-N(13)-C(26)        | 109.8(4)          |                          |                   |
| N(14)-C(20)       | 1.489(8)           | C(29)-N(13)-C(27)        | 109.6(4)          |                          |                   |
| N(14)-C(21)       | 1.494(7)           | C(28)-N(13)-C(27)        | 110.4(4)          |                          |                   |
| N(14)-C(19)       | 1.517(7)           | C(26)-N(13)-C(27)        | 107.0(5)          |                          |                   |
| S(2)-C(2)         | 1.651(8)           | C(13)-N(10)-C(12)        | 110.3(5)          |                          |                   |
| N(2)-C(2)         | 1.105(8)           | C(13)-N(10)-C(11)        | 109.5(5)          |                          |                   |

***Synthetic Procedure for compounds 4-7:*** Compounds **4-7** were synthesized during a comprehensive effort to prepare other potential heterometallic  $\text{UO}_2^{2+}/\text{Co}^{2+}$  phases. Similar to  $\text{TMA}^+$ , cations (tetraethylammonium ( $\text{TEA}^+$ ) and cesium ( $\text{Cs}^+$ )) were selected due to their inability to participate in meaningful non-covalent interactions, as assembly via electrostatic attraction was expected. Pyridine ( $\text{Py}^+$ ), however, was chosen to determine the role of hydrogen bonding on assembly in these materials. These synthetic attempts sought to pair the  $[\text{UO}_2(\text{NCS})_5]^{3-}$  and/or  $[\text{Co}(\text{NCS})_4]^{2-}$ , with  $\text{TMA}^+$ ,  $\text{TEA}^+$ ,  $\text{Cs}^+$ , and  $\text{Py}^+$  present to provide charge balance. In the case of  $\text{TEA}^+$ ,  $\text{Cs}^+$ , and  $\text{Py}^+$ , no heterometallic phases were observed. We also prepared a polymorph of **1**, which appeared as a secondary product during synthesis. Compounds **4-7** represent the importance of strict cation and/or synthesis parameters for **1-3**, as slight changes to reaction conditions or cation identity led to structural variation and prevented the formation of heterometallic phases.

*Homometallic Co phase: Compound 4*  $\text{Cs}_3[\text{Co}(\text{NCS})_4](\text{NCS})$

Cobalt chloride hexahydrate (0.025g, 0.105 mmol) and 6 equivalents of KSCN (0.0613 g, 0.631 mmol) were added to 5 mL of  $\text{H}_2\text{O}$  in a 20 mL glass scintillation vial. To this solution, 3 molar equivalents of  $\text{Cs}^+$  were added. All reactions were left to evaporate to dryness at room temperature, with crystals forming rapidly over the course of several hours.

*Homometallic U-phases: Compound 5-7*

**Caution!** Although the uranium source used (uranyl acetate dihydrate  $[\text{UO}_2(\text{CH}_3\text{COO})_2]\cdot 2\text{H}_2\text{O}$ ) contains depleted uranium, precautions for handling radioactive materials should be followed.

Uranyl acetate dihydrate (0.025 g, 0.059 mmol) and 6 molar equivalents of potassium thiocyanate (0.0344 g, 0.354 mmol) were added to 5 mL of water in a 20 mL glass scintillation vial. To the resultant clear, yellow solution, 4 molar equivalents of the desired cation (tetramethylammonium (TMA<sup>+</sup>), tetraethylammonium (TEA<sup>+</sup>), cesium (Cs<sup>+</sup>), or pyridinium (Py<sup>+</sup>)) were added. The pH was adjusted from approximately 6.5 to 4 using concentrated HCl, to allow for protonation of the organic if necessary and serve to restrict uranyl speciation. Solutions were left to evaporate to dryness in the fume hood over the course of several days. These phases may also be prepared hydrothermally at 90°C for 72 hours in a Teflon-lined acid digestion vessel. Performing the hydrothermal syntheses at temperatures above 100°C or at a pH below 3, however results in -NCS ligand degradation.

**Table S5:** Crystallography table for compounds **4-7**

|                            | <b>4</b>                                                                                                             | <b>5</b>                                                                                                                 | <b>6</b>                                                                                                                               |
|----------------------------|----------------------------------------------------------------------------------------------------------------------|--------------------------------------------------------------------------------------------------------------------------|----------------------------------------------------------------------------------------------------------------------------------------|
| Chemical Formula           | Cs <sub>9</sub> [Co(NCS) <sub>4</sub> ] <sub>4</sub> (NCS)                                                           | (C <sub>8</sub> H <sub>20</sub> N) <sub>2</sub> [UO <sub>2</sub> (NCS) <sub>4</sub> (H <sub>2</sub> O)]·H <sub>2</sub> O | (C <sub>5</sub> H <sub>6</sub> N) <sub>3</sub> [UO <sub>2</sub> (NCS) <sub>5</sub> ]·H <sub>2</sub> O, C <sub>5</sub> H <sub>5</sub> N |
| Formula Weight (g/mol)     | 2419.3                                                                                                               | 798.9                                                                                                                    | 818.8                                                                                                                                  |
| Crystal System             | Monoclinic                                                                                                           | Orthorhombic                                                                                                             | Monoclinic                                                                                                                             |
| Space Group                | P2 <sub>1</sub> /c                                                                                                   | Pna2 <sub>1</sub>                                                                                                        | P2 <sub>1</sub> /c                                                                                                                     |
| <i>a</i> (Å)               | 25.482(1)                                                                                                            | 30.443(3)                                                                                                                | 16.616(1)                                                                                                                              |
| <i>b</i> (Å)               | 11.912(1)                                                                                                            | 7.848(1)                                                                                                                 | 10.747(1)                                                                                                                              |
| <i>c</i> (Å)               | 21.147(1)                                                                                                            | 13.503(1)                                                                                                                | 16.179(1)                                                                                                                              |
| $\alpha$ (°)               | 90                                                                                                                   | 90                                                                                                                       | 90                                                                                                                                     |
| $\beta$ (°)                | 114.254(1)                                                                                                           | 90                                                                                                                       | 91.766(1)                                                                                                                              |
| $\gamma$ (°)               | 90                                                                                                                   | 90                                                                                                                       | 90                                                                                                                                     |
| <i>V</i> (Å <sup>3</sup> ) | 5852.3(3)                                                                                                            | 3226.0(6)                                                                                                                | 2887.7(2)                                                                                                                              |
| <i>Z</i>                   | 4                                                                                                                    | 4                                                                                                                        | 4                                                                                                                                      |
| <i>T</i> (K)               | 100(2)                                                                                                               | 100(2)                                                                                                                   | 100(2)                                                                                                                                 |
| $\lambda$ (Mo K $\alpha$ ) | 0.71073                                                                                                              | 0.71073                                                                                                                  | 0.71073                                                                                                                                |
| $\mu$ (mm <sup>-1</sup> )  | 7.275                                                                                                                | 5.323                                                                                                                    | 6.020                                                                                                                                  |
| <i>R</i> <sub>int</sub>    | 0.0322                                                                                                               | 0.0660                                                                                                                   | 0.0410                                                                                                                                 |
| <i>R</i> <sub>1</sub>      | 0.0211                                                                                                               | 0.0308                                                                                                                   | 0.0167                                                                                                                                 |
| w <i>R</i> <sub>2</sub>    | 0.0478                                                                                                               | 0.0608                                                                                                                   | 0.0358                                                                                                                                 |
|                            | <b>7</b>                                                                                                             |                                                                                                                          |                                                                                                                                        |
| Chemical Formula           | (C <sub>4</sub> H <sub>12</sub> N) <sub>6</sub> [UO <sub>2</sub> (NCS) <sub>5</sub> ] <sub>2</sub> ·H <sub>2</sub> O |                                                                                                                          |                                                                                                                                        |
| Formula Weight             | 782.9                                                                                                                |                                                                                                                          |                                                                                                                                        |
| Crystal System             | Orthorhombic                                                                                                         |                                                                                                                          |                                                                                                                                        |
| Space Group                | Pbca                                                                                                                 |                                                                                                                          |                                                                                                                                        |
| <i>a</i> (Å)               | 13.921(1)                                                                                                            |                                                                                                                          |                                                                                                                                        |
| <i>b</i> (Å)               | 13.221(1)                                                                                                            |                                                                                                                          |                                                                                                                                        |
| <i>c</i> (Å)               | 34.149(2)                                                                                                            |                                                                                                                          |                                                                                                                                        |
| $\alpha$ (°)               | 90                                                                                                                   |                                                                                                                          |                                                                                                                                        |
| $\beta$ (°)                | 90                                                                                                                   |                                                                                                                          |                                                                                                                                        |
| $\gamma$ (°)               | 90                                                                                                                   |                                                                                                                          |                                                                                                                                        |
| <i>V</i> (Å <sup>3</sup> ) | 6285.1(6)                                                                                                            |                                                                                                                          |                                                                                                                                        |
| <i>Z</i>                   | 8                                                                                                                    |                                                                                                                          |                                                                                                                                        |
| <i>T</i> (K)               | 100(2)                                                                                                               |                                                                                                                          |                                                                                                                                        |
| $\lambda$ (Mo K $\alpha$ ) | 0.71073                                                                                                              |                                                                                                                          |                                                                                                                                        |
| $\mu$ (mm <sup>-1</sup> )  | 5.524                                                                                                                |                                                                                                                          |                                                                                                                                        |
| <i>R</i> <sub>int</sub>    | 0.0574                                                                                                               |                                                                                                                          |                                                                                                                                        |
| <i>R</i> <sub>1</sub>      | 0.0409                                                                                                               |                                                                                                                          |                                                                                                                                        |
| w <i>R</i> <sub>2</sub>    | 0.0774                                                                                                               |                                                                                                                          |                                                                                                                                        |

**Figure S4:** ORTEP drawing of compound **4**, Cs<sub>9</sub>[Co(NCS)<sub>4</sub>]<sub>4</sub>(NCS).

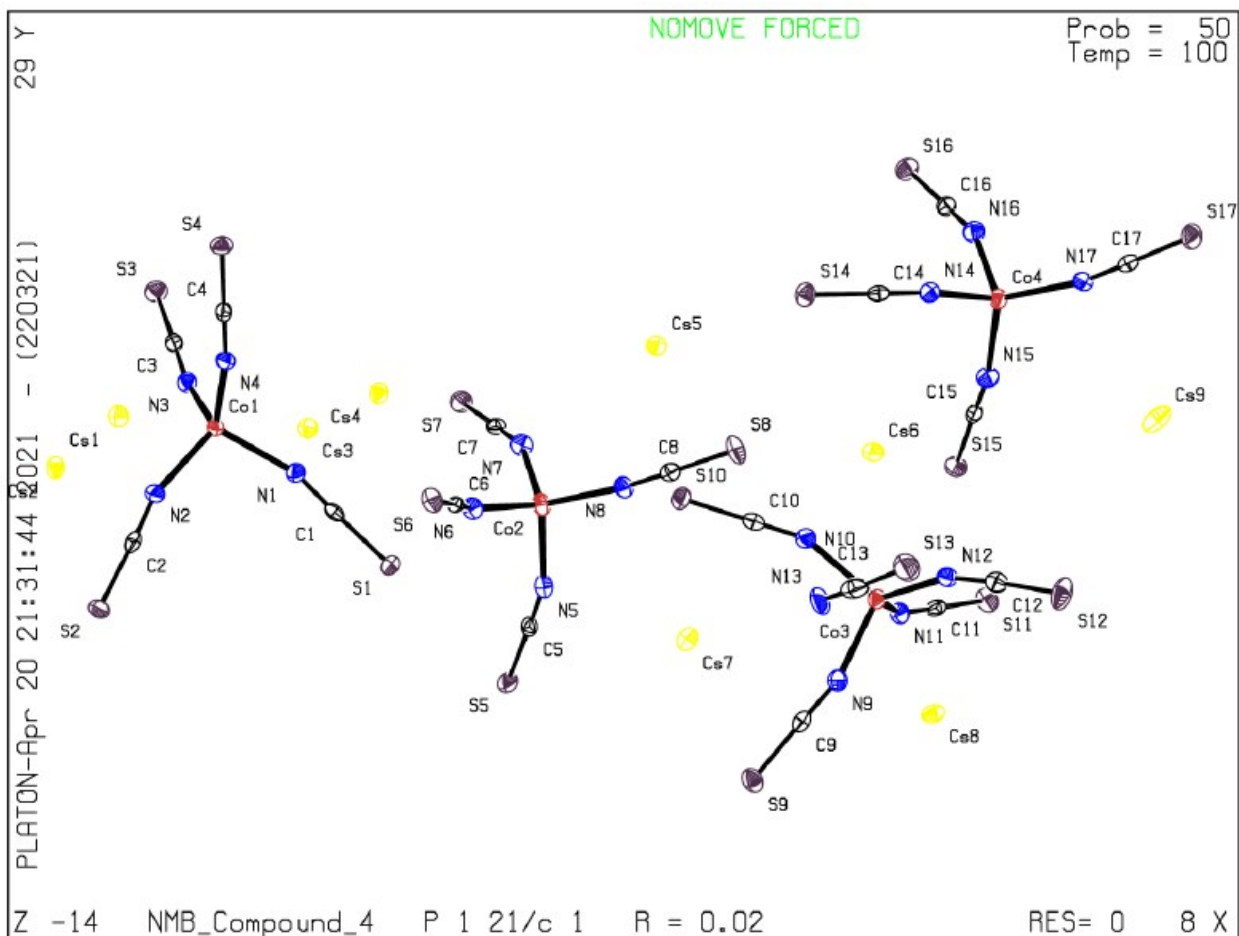

**Table S6:** Bond distances and angles for compound **4**, Cs<sub>9</sub>[Co(NCS)<sub>4</sub>]<sub>4</sub>(NCS)

| Atom 1-Atom 2 | Bond Length (Å) | Atom 1-Atom 2-Atom 3 | Bond Angle (°) |
|---------------|-----------------|----------------------|----------------|
| Co(1)-N(4)    | 1.965(3)        | N(4)-Co(1)-N(3)      | 104.85(13)     |
| Co(1)-N(3)    | 1.965(3)        | N(3)-Co(1)-N(1)      | 110.17(13)     |
| Co(1)-N(1)    | 1.966(3)        | N(4)-Co(1)-N(2)      | 112.69(13)     |
| Co(1)-N(2)    | 1.968(3)        | N(3)-Co(1)-N(2)      | 112.67(13)     |
| Co(2)-N(8)    | 1.947(3)        | N(1)-Co(1)-N(2)      | 112.19(13)     |
| Co(2)-N(6)    | 1.959(3)        | N(8)-Co(2)-N(6)      | 104.46(13)     |
| Co(2)-N(7)    | 1.981(3)        | N(8)-Co(2)-N(7)      | 113.38(13)     |
| Co(2)-N(5)    | 1.988(3)        | N(6)-Co(2)-N(7)      | 111.99(13)     |
| Co(4)-N(17)   | 1.953(3)        | N(8)-Co(2)-N(5)      | 111.39(13)     |
| Co(4)-N(15)   | 1.956(3)        | N(7)-Co(2)-N(5)      | 108.36(13)     |
| Co(4)-N(14)   | 1.983(3)        | N(17)-Co(4)-N(15)    | 100.73(13)     |
| Co(4)-N(16)   | 1.988(3)        | N(17)-Co(4)-N(14)    | 116.58(13)     |
| Co(3)-N(12)   | 1.945(3)        | N(15)-Co(4)-N(14)    | 114.71(13)     |
| Co(3)-N(10)   | 1.977(3)        | N(12)-Co(3)-N(10)    | 101.83(13)     |
| Co(3)-N(11)   | 1.978(3)        | N(12)-Co(3)-N(11)    | 113.03(13)     |
| Co(3)-N(9)    | 1.986(3)        | N(10)-Co(3)-N(11)    | 114.84(13)     |
| S(1)-C(1)     | 1.627(4)        | N(12)-Co(3)-N(9)     | 109.61(13)     |
| S(4)-C(4)     | 1.624(4)        | N(10)-Co(3)-N(9)     | 110.56(13)     |
| S(16)-C(16)   | 1.632(4)        | N(11)-Co(3)-N(9)     | 103.05(13)     |
| S(2)-C(2)     | 1.629(4)        | C(7)-N(7)-Co(2)      | 104.79(13)     |
| S(14)-C(14)   | 1.625(4)        | C(8)-N(8)-Co(2)      | 157.0(3)       |
| S(15)-C(15)   | 1.631(4)        | C(17)-N(17)-Co(4)    | 173.9(3)       |
| S(7)-C(7)     | 1.625(4)        | N(3)-C(3)-S(3)       | 167.5(3)       |
| S(3)-C(3)     | 1.622(4)        | C(16)-N(16)-Co(4)    | 176.7(4)       |
| S(10)-C(10)   | 1.623(4)        | C(4)-N(4)-Co(1)      | 158.5(3)       |
| S(6)-C(6)     | 1.610(4)        | C(5)-N(5)-Co(2)      | 162.4(3)       |
| S(9)-C(9)     | 1.622(4)        | N(4)-C(4)-S(4)       | 160.1(3)       |
| S(5)-C(5)     | 1.618(4)        | N(11)-C(11)-S(11)    | 177.7(4)       |
| S(11)-C(11)   | 1.620(4)        | C(3)-N(3)-Co(1)      | 178.7(4)       |
| S(8)-C(8)     | 1.624(4)        | C(9)-N(9)-Co(3)      | 163.6(3)       |
| S(12)-C(12)   | 1.615(4)        | C(15)-N(15)-Co(4)    | 117.22(9)      |
| S(17)-C(17)   | 1.621(4)        | C(10)-N(10)-Co(3)    | 114.23(9)      |
| S(13)-C(13)   | 1.652(6)        | N(6)-C(6)-S(6)       | 156.8(3)       |
| N(12)-C(12)   | 1.173(5)        | C(6)-N(6)-Co(2)      | 179.4(4)       |
| N(7)-C(7)     | 1.163(5)        | C(11)-N(11)-Co(3)    | 149.0(3)       |
| N(8)-C(8)     | 1.161(5)        | N(15)-C(15)-S(15)    | 150.3(3)       |
| N(17)-C(17)   | 1.172(5)        | C(14)-N(14)-Co(4)    | 178.3(4)       |
| C(3)-N(3)     | 1.171(5)        | C(2)-N(2)-Co(1)      | 157.1(3)       |
| N(16)-C(16)   | 1.166(5)        | N(9)-C(9)-S(9)       | 162.9(3)       |
| N(4)-C(4)     | 1.168(5)        | N(12)-C(12)-S(12)    | 177.8(4)       |
| N(5)-C(5)     | 1.164(5)        | N(16)-C(16)-S(16)    | 175.7(4)       |
| C(11)-N(11)   | 1.173(5)        | N(2)-C(2)-S(2)       | 177.4(4)       |
| N(9)-C(9)     | 1.162(5)        | N(10)-C(10)-S(10)    | 177.8(3)       |
| N(15)-C(15)   | 1.159(5)        | N(13)-C(13)-S(13)    | 179.9(4)       |
| N(10)-C(10)   | 1.170(5)        | N(14)-C(14)-S(14)    | 178.3(4)       |
| C(6)-N(6)     | 1.183(5)        | N(8)-C(8)-S(8)       | 178.2(3)       |
| N(14)-C(14)   | 1.167(5)        | N(1)-C(1)-S(1)       | 178.2(4)       |
| N(2)-C(2)     | 1.165(5)        | N(5)-C(5)-S(5)       | 178.0(3)       |
| C(13)-N(13)   | 1.097(6)        | N(17)-C(17)-S(17)    | 178.6(3)       |
| N(1)-C(1)     | 1.168(5)        | N(7)-C(7)-S(7)       | 177.7(4)       |

**Figure S5:** ORTEP drawing of compound **5**,  $(C_8H_{20}N)_2[UO_2(NCS)_4(H_2O)] \cdot H_2O$ .

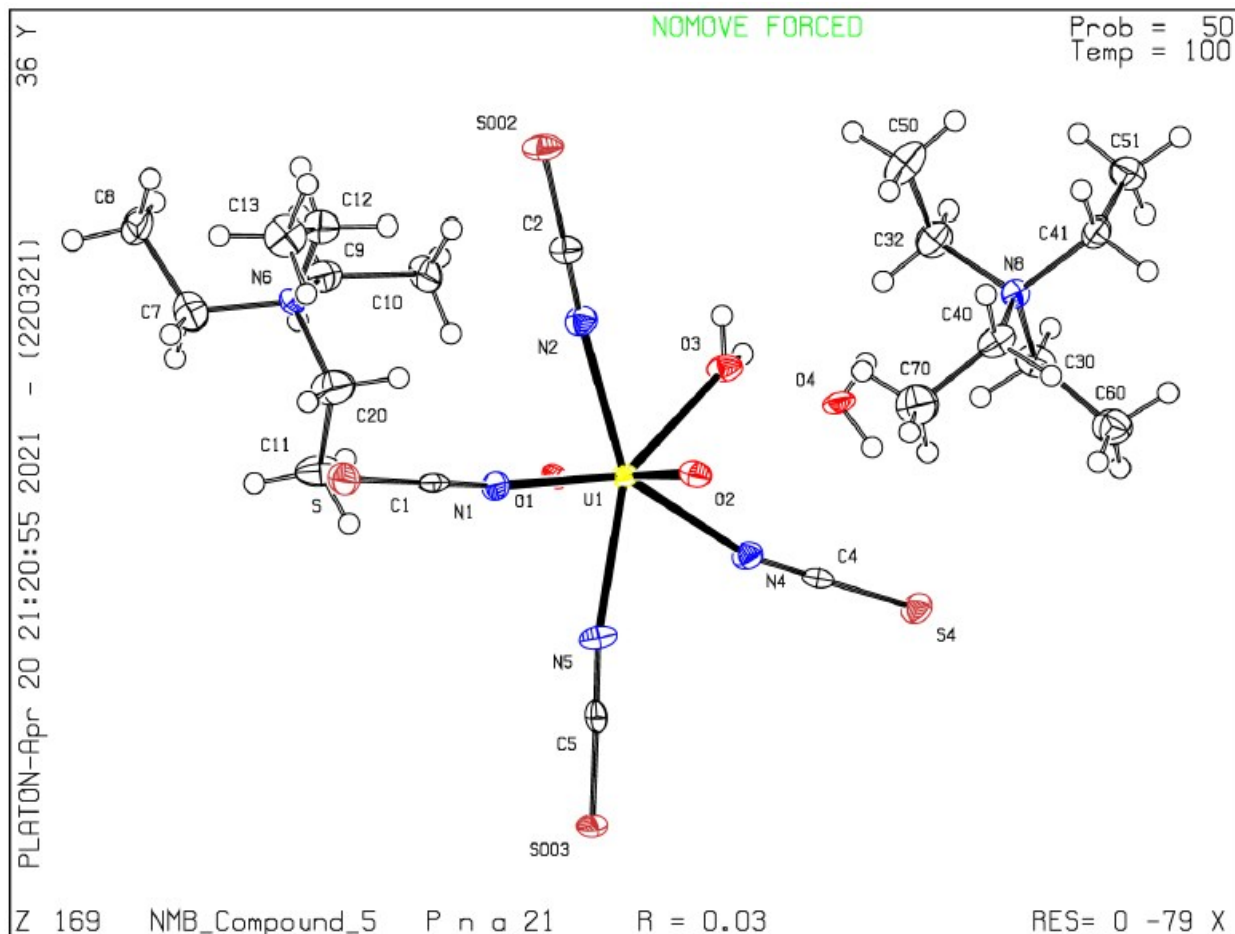

**Table S7:** Bond distances and angles for compound **5**, (C<sub>8</sub>H<sub>20</sub>N)<sub>2</sub>[UO<sub>2</sub>(NCS)<sub>4</sub>(H<sub>2</sub>O)]·H<sub>2</sub>O

| Atom 1-Atom 2 | Bond Length (Å) | Atom 1-Atom 2-Atom 3 | Bond Angle (°) |
|---------------|-----------------|----------------------|----------------|
| U(1)-O(2)     | 1.760(5)        | O(2)-U(1)-O(1)       | 179.0(3)       |
| U(1)-O(1)     | 1.772(4)        | O(2)-U(1)-N(1)       | 88.8(2)        |
| U(1)-N(1)     | 2.417(6)        | O(1)-U(1)-N(1)       | 92.1(2)        |
| U(1)-N(2)     | 2.426(10)       | O(2)-U(1)-N(2)       | 89.3(4)        |
| U(1)-N(5)     | 2.437(9)        | O(1)-U(1)-N(2)       | 90.4(3)        |
| U(1)-N(4)     | 2.448(9)        | N(1)-U(1)-N(2)       | 74.4(3)        |
| U(1)-O(3)     | 2.495(7)        | O(2)-U(1)-N(5)       | 92.0(4)        |
| S(002)-C(2)   | 1.636(12)       | O(1)-U(1)-N(5)       | 88.8(3)        |
| S(003)-C(5)   | 1.625(12)       | N(1)-U(1)-N(5)       | 75.7(3)        |
| S-C(1)        | 1.629(9)        | N(2)-U(1)-N(5)       | 150.0(3)       |
| N(2)-C(2)     | 1.150(14)       | O(2)-U(1)-N(4)       | 86.6(3)        |
| O(3)-H(3A)    | 0.80(3)         | O(1)-U(1)-N(4)       | 93.0(3)        |
| O(3)-H(3B)    | 0.80(3)         | N(1)-U(1)-N(4)       | 147.1(3)       |
| N(1)-C(1)     | 1.153(10)       | N(2)-U(1)-N(4)       | 138.0(3)       |
| C(10)-C(9)    | 1.526(13)       | N(5)-U(1)-N(4)       | 72.0(3)        |
| C(5)-N(5)     | 1.169(13)       | O(2)-U(1)-O(3)       | 91.9(3)        |
| N(4)-C(4)     | 1.162(11)       | O(1)-U(1)-O(3)       | 87.1(3)        |
| C(9)-N(6)     | 1.506(11)       | N(1)-U(1)-O(3)       | 144.0(3)       |
| C(13)-C(12)   | 1.524(12)       | N(2)-U(1)-O(3)       | 69.6(3)        |
| C(7)-N(6)     | 1.508(11)       | N(5)-U(1)-O(3)       | 140.2(3)       |
| C(7)-C(8)     | 1.518(12)       | N(4)-U(1)-O(3)       | 68.8(2)        |
| N(6)-C(20)    | 1.481(11)       | C(2)-N(2)-U(1)       | 169.9(9)       |
| N(6)-C(12)    | 1.512(10)       | C(1)-N(1)-U(1)       | 174.0(7)       |
| C(11)-C(20)   | 1.547(14)       | N(5)-C(5)-S(003)     | 178.7(10)      |
| C(4)-S(4)     | 1.635(9)        | C(4)-N(4)-U(1)       | 163.6(7)       |
| O(4)-H(4A)    | 0.83(3)         | N(2)-C(2)-S(002)     | 178.8(11)      |
| O(4)-H(4B)    | 0.83(3)         | N(6)-C(9)-C(10)      | 115.3(7)       |
| C(60)-C(30)   | 1.515(17)       | N(6)-C(7)-C(8)       | 116.2(7)       |
| C(30)-N(8)    | 1.503(10)       | N(1)-C(1)-S          | 178.8(8)       |
| C(32)-N(8)    | 1.516(10)       | C(20)-N(6)-C(9)      | 111.7(7)       |
| C(32)-C(50)   | 1.527(12)       | C(20)-N(6)-C(7)      | 109.3(7)       |
| N(8)-C(40)    | 1.518(10)       | C(9)-N(6)-C(7)       | 108.0(6)       |
| N(8)-C(41)    | 1.522(10)       | C(20)-N(6)-C(12)     | 107.9(7)       |
| C(40)-C(70)   | 1.510(12)       | C(9)-N(6)-C(12)      | 108.4(6)       |
| C(41)-C(51)   | 1.531(14)       | C(7)-N(6)-C(12)      | 111.5(6)       |
|               |                 | N(6)-C(12)-C(13)     | 115.6(7)       |
|               |                 | C(5)-N(5)-U(1)       | 165.6(8)       |
|               |                 | N(4)-C(4)-S(4)       | 178.1(8)       |
|               |                 | N(6)-C(20)-C(11)     | 116.7(8)       |
|               |                 | N(8)-C(30)-C(60)     | 115.9(8)       |
|               |                 | N(8)-C(32)-C(50)     | 114.2(8)       |
|               |                 | C(30)-N(8)-C(32)     | 107.0(6)       |
|               |                 | C(30)-N(8)-C(40)     | 110.7(6)       |
|               |                 | C(32)-N(8)-C(40)     | 111.2(6)       |
|               |                 | C(30)-N(8)-C(41)     | 111.2(6)       |
|               |                 | C(32)-N(8)-C(41)     | 111.4(6)       |
|               |                 | C(40)-N(8)-C(41)     | 105.4(6)       |
|               |                 | C(70)-C(40)-N(8)     | 114.6(7)       |
|               |                 | N(8)-C(41)-C(51)     | 115.7(8)       |



**Figure S6:** ORTEP drawing of compound **6**,  $(C_5H_6N)_3[UO_2(NCS)_5] \cdot H_2O, C_5H_5N$

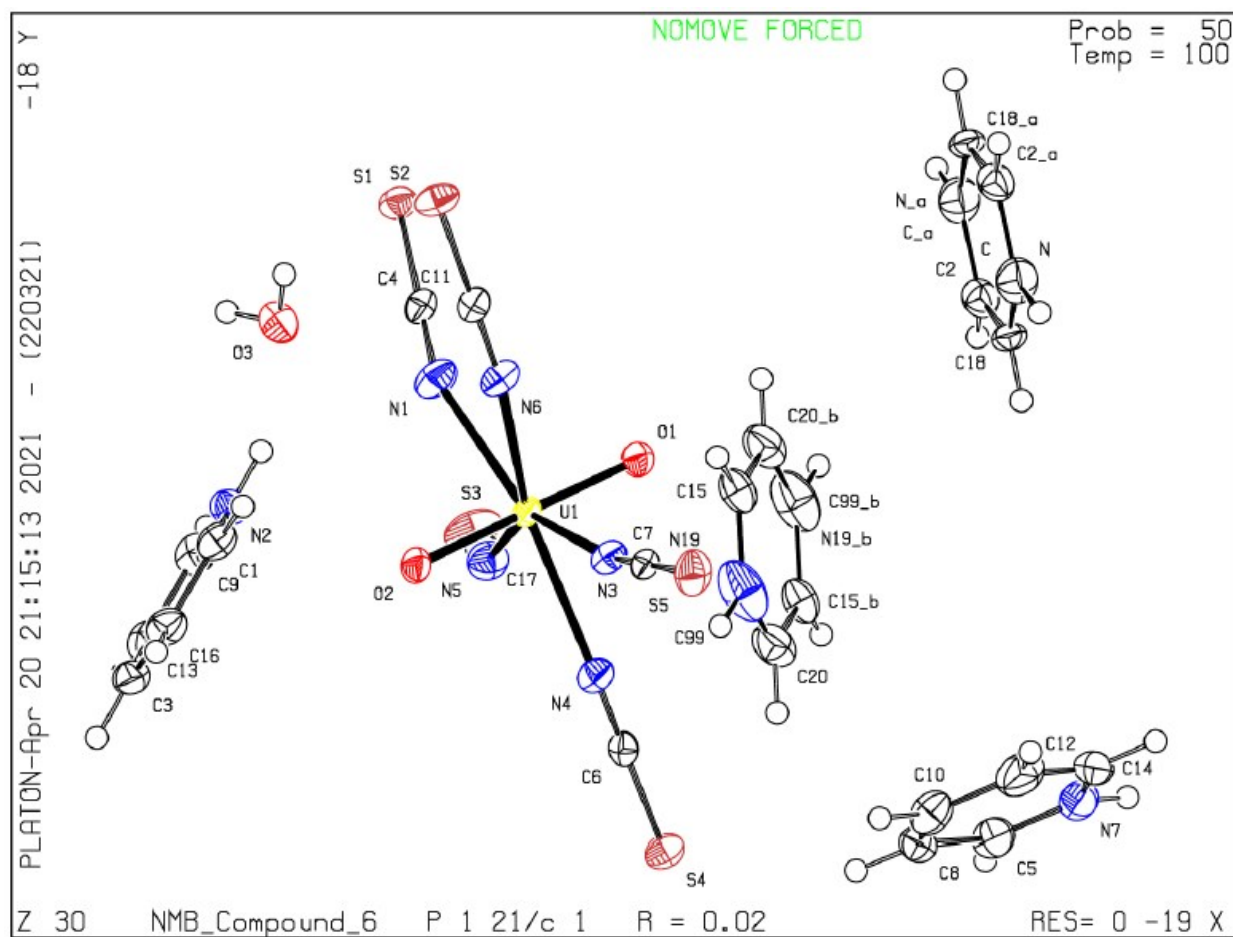

**Table S8:** Bond distances and angles for compound **6**, (C<sub>5</sub>H<sub>6</sub>N)<sub>3</sub>[UO<sub>2</sub>(NCS)<sub>5</sub>]·H<sub>2</sub>O, C<sub>5</sub>H<sub>5</sub>N

| Atom 1-Atom 2 | Bond Length (Å) | Atom 1-Atom 2-Atom 3 | Bond Angle (°) |
|---------------|-----------------|----------------------|----------------|
| U(1)-O(1)     | 1.7692(16)      | O(2)-U(1)-O(1)       | 179.7(2)       |
| U(1)-O(2)     | 1.7712(16)      | O(2)-U(1)-N(4)       | 92.3(2)        |
| U(1)-N(3)     | 2.443(2)        | O(1)-U(1)-N(4)       | 87.7(2)        |
| U(1)-N(1)     | 2.446(2)        | O(2)-U(1)-N(1)       | 92.08(19)      |
| U(1)-N(5)     | 2.447(2)        | O(1)-U(1)-N(1)       | 87.81(18)      |
| U(1)-N(4)     | 2.448(2)        | N(4)-U(1)-N(1)       | 144.12(18)     |
| U(1)-N(6)     | 2.463(2)        | O(2)-U(1)-N(5)       | 87.25(19)      |
| N(1)-C(4)     | 1.155(3)        | O(1)-U(1)-N(5)       | 92.48(19)      |
| S(2)-C(11)    | 1.640(2)        | N(4)-U(1)-N(5)       | 71.84(18)      |
| N(6)-C(11)    | 1.156(3)        | N(1)-U(1)-N(5)       | 72.82(17)      |
| S(1)-C(4)     | 1.635(3)        | O(2)-U(1)-N(3)       | 90.67(18)      |
| N(3)-C(7)     | 1.162(3)        | O(1)-U(1)-N(3)       | 89.56(18)      |
| S(4)-C(6)     | 1.623(2)        | N(4)-U(1)-N(3)       | 72.34(18)      |
| N(4)-C(6)     | 1.162(3)        | N(1)-U(1)-N(3)       | 143.18(17)     |
| S(5)-C(7)     | 1.628(3)        | N(5)-U(1)-N(3)       | 144.00(18)     |
| N(5)-C(17)    | 1.141(3)        | O(2)-U(1)-N(2)       | 90.67(19)      |
| S(3)-C(17)    | 1.634(3)        | O(1)-U(1)-N(2)       | 89.53(18)      |
| C(16)-C(1)    | 1.366(4)        | N(4)-U(1)-N(2)       | 143.94(18)     |
| C(16)-C(3)    | 1.386(4)        | N(1)-U(1)-N(2)       | 71.56(17)      |
| N(2)-C(9)     | 1.331(3)        | N(5)-U(1)-N(2)       | 144.22(18)     |
| N(2)-C(1)     | 1.345(3)        | N(3)-U(1)-N(2)       | 71.69(17)      |
| C(3)-C(13)    | 1.372(4)        | C(5)-N(5)-U(1)       | 171.4(5)       |
| C(9)-C(13)    | 1.371(4)        | C(3)-N(3)-U(1)       | 173.4(5)       |
| O(3)-H(3A)    | 0.94(4)         | C(8)-N(6)-C(6)       | 109.9(6)       |
| O(3)-H(3B)    | 0.86(4)         | C(8)-N(6)-C(9)       | 109.7(5)       |
|               |                 | C(6)-N(6)-C(9)       | 108.7(5)       |
|               |                 | C(8)-N(6)-C(7)       | 109.7(5)       |
|               |                 | C(6)-N(6)-C(7)       | 109.0(6)       |
|               |                 | C(9)-N(6)-C(7)       | 109.9(6)       |
|               |                 | C(2)-N(2)-U(1)       | 172.1(5)       |
|               |                 | C(4)-N(4)-U(1)       | 164.3(5)       |
|               |                 | N(2)-C(2)-S(2)       | 179.5(6)       |
|               |                 | N(4)-C(4)-S(4)       | 178.1(6)       |
|               |                 | C(10)-N(7)-C(13)     | 110.0(5)       |
|               |                 | C(10)-N(7)-C(12)     | 110.2(5)       |
|               |                 | C(13)-N(7)-C(12)     | 109.6(5)       |
|               |                 | C(10)-N(7)-C(11)     | 109.1(5)       |
|               |                 | C(13)-N(7)-C(11)     | 109.6(6)       |
|               |                 | C(12)-N(7)-C(11)     | 108.3(5)       |
|               |                 | C(17)-N(8)-C(14)     | 109.8(5)       |
|               |                 | C(17)-N(8)-C(15)     | 109.9(5)       |
|               |                 | C(14)-N(8)-C(15)     | 109.4(5)       |
|               |                 | C(17)-N(8)-C(16)     | 109.0(5)       |
|               |                 | C(14)-N(8)-C(16)     | 109.4(5)       |
|               |                 | C(15)-N(8)-C(16)     | 109.3(5)       |
|               |                 | N(1)-C(1)-S(1)       | 178.8(6)       |
|               |                 | N(3)-C(3)-S(3)       | 178.5(6)       |
|               |                 | N(5)-C(5)-S(5)       | 178.0(6)       |
|               |                 | C(1)-N(1)-U(1)       | 173.6(5)       |

**Figure S7:** ORTEP drawing of compound 7, (C<sub>4</sub>H<sub>12</sub>N)<sub>3</sub>[UO<sub>2</sub>(NCS)<sub>5</sub>]

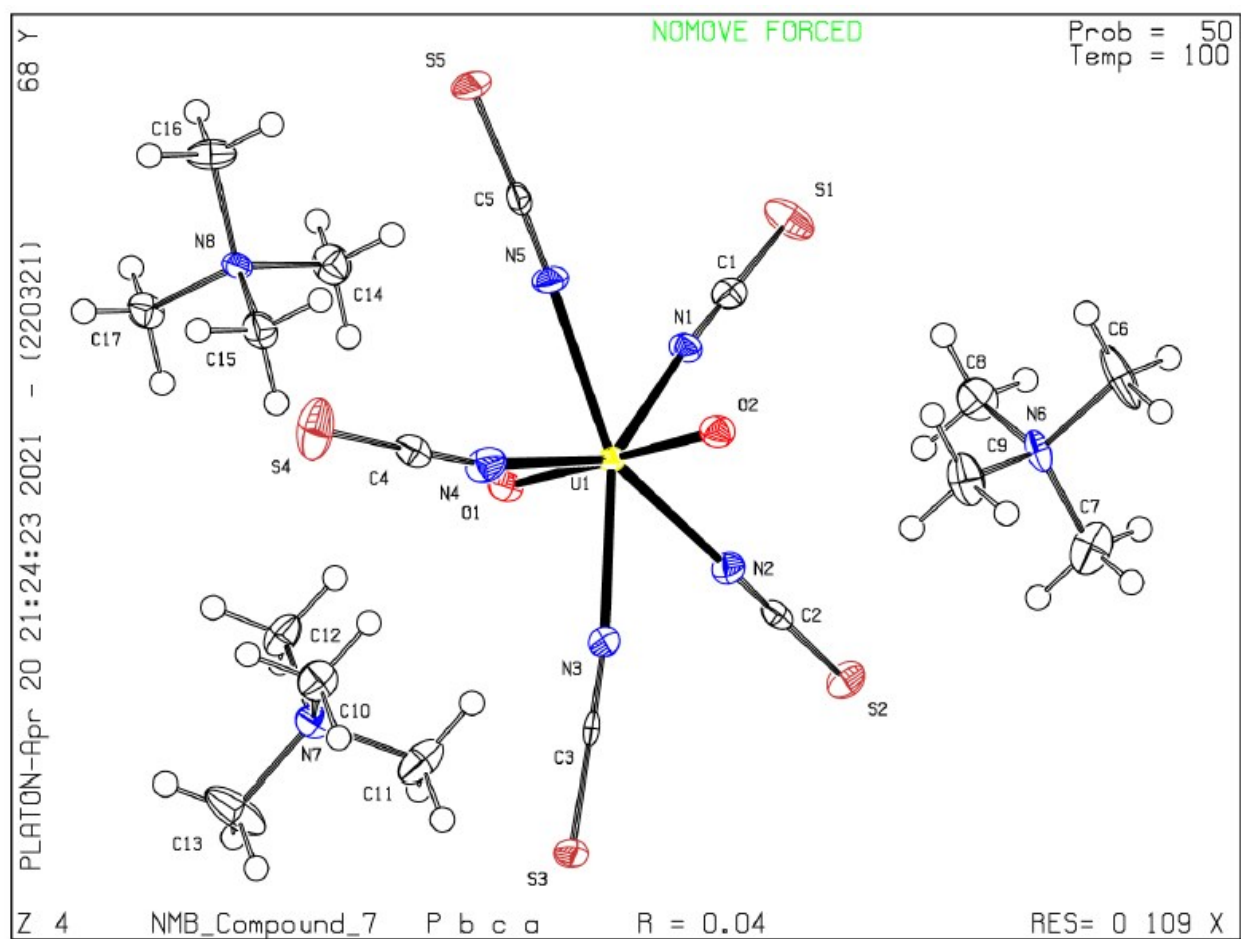

**Table S9:** Bond distances and angles for compound **7**, (C<sub>4</sub>H<sub>12</sub>N)<sub>3</sub>[UO<sub>2</sub>(NCS)<sub>5</sub>]

| Atom 1-Atom 2 | Bond Length (Å) | Atom 1-Atom 2-Atom 3 | Bond Angle (°) |
|---------------|-----------------|----------------------|----------------|
| U(1)-O(2)     | 1.764(4)        | O(2)-U(1)-O(1)       | 179.7(2)       |
| U(1)-O(1)     | 1.776(4)        | O(2)-U(1)-N(4)       | 92.3(2)        |
| U(1)-N(4)     | 2.427(6)        | O(1)-U(1)-N(4)       | 87.7(2)        |
| U(1)-N(1)     | 2.430(5)        | O(2)-U(1)-N(1)       | 92.08(19)      |
| U(1)-N(5)     | 2.437(5)        | O(1)-U(1)-N(1)       | 87.81(18)      |
| U(1)-N(3)     | 2.453(5)        | N(4)-U(1)-N(1)       | 144.12(18)     |
| U(1)-N(2)     | 2.461(5)        | O(2)-U(1)-N(5)       | 87.25(19)      |
| S(2)-C(2)     | 1.636(6)        | O(1)-U(1)-N(5)       | 92.48(19)      |
| S(3)-C(3)     | 1.631(6)        | N(4)-U(1)-N(5)       | 71.84(18)      |
| S(1)-C(1)     | 1.628(7)        | N(1)-U(1)-N(5)       | 72.82(17)      |
| S(5)-C(5)     | 1.632(6)        | O(2)-U(1)-N(3)       | 90.67(18)      |
| S(4)-C(4)     | 1.612(7)        | O(1)-U(1)-N(3)       | 89.56(18)      |
| N(5)-C(5)     | 1.155(8)        | N(4)-U(1)-N(3)       | 72.34(18)      |
| N(3)-C(3)     | 1.160(8)        | N(1)-U(1)-N(3)       | 143.18(17)     |
| N(6)-C(8)     | 1.489(8)        | N(5)-U(1)-N(3)       | 144.00(18)     |
| N(6)-C(6)     | 1.489(8)        | O(2)-U(1)-N(2)       | 90.67(19)      |
| N(6)-C(9)     | 1.490(8)        | O(1)-U(1)-N(2)       | 89.53(18)      |
| N(6)-C(7)     | 1.500(9)        | N(4)-U(1)-N(2)       | 143.94(18)     |
| N(2)-C(2)     | 1.163(8)        | N(1)-U(1)-N(2)       | 71.56(17)      |
| N(4)-C(4)     | 1.162(8)        | N(5)-U(1)-N(2)       | 144.22(18)     |
| N(7)-C(10)    | 1.488(8)        | N(3)-U(1)-N(2)       | 71.69(17)      |
| N(7)-C(13)    | 1.490(8)        | C(5)-N(5)-U(1)       | 171.4(5)       |
| N(7)-C(12)    | 1.491(8)        | C(3)-N(3)-U(1)       | 173.4(5)       |
| N(7)-C(11)    | 1.507(8)        | C(8)-N(6)-C(6)       | 109.9(6)       |
| N(8)-C(17)    | 1.489(7)        | C(8)-N(6)-C(9)       | 109.7(5)       |
| N(8)-C(14)    | 1.489(8)        | C(6)-N(6)-C(9)       | 108.7(5)       |
| N(8)-C(15)    | 1.491(8)        | C(8)-N(6)-C(7)       | 109.7(5)       |
| N(8)-C(16)    | 1.501(8)        | C(6)-N(6)-C(7)       | 109.0(6)       |
| C(1)-N(1)     | 1.157(8)        | C(9)-N(6)-C(7)       | 109.9(6)       |
|               |                 | C(2)-N(2)-U(1)       | 172.1(5)       |
|               |                 | C(4)-N(4)-U(1)       | 164.3(5)       |
|               |                 | N(2)-C(2)-S(2)       | 179.5(6)       |
|               |                 | N(4)-C(4)-S(4)       | 178.1(6)       |
|               |                 | C(10)-N(7)-C(13)     | 110.0(5)       |
|               |                 | C(10)-N(7)-C(12)     | 110.2(5)       |
|               |                 | C(13)-N(7)-C(12)     | 109.6(5)       |
|               |                 | C(10)-N(7)-C(11)     | 109.1(5)       |
|               |                 | C(13)-N(7)-C(11)     | 109.6(6)       |
|               |                 | C(12)-N(7)-C(11)     | 108.3(5)       |
|               |                 | C(17)-N(8)-C(14)     | 109.8(5)       |
|               |                 | C(17)-N(8)-C(15)     | 109.9(5)       |
|               |                 | C(14)-N(8)-C(15)     | 109.4(5)       |
|               |                 | C(17)-N(8)-C(16)     | 109.0(5)       |
|               |                 | C(14)-N(8)-C(16)     | 109.4(5)       |
|               |                 | C(15)-N(8)-C(16)     | 109.3(5)       |
|               |                 | N(1)-C(1)-S(1)       | 178.8(6)       |
|               |                 | N(3)-C(3)-S(3)       | 178.5(6)       |
|               |                 | N(5)-C(5)-S(5)       | 178.0(6)       |
|               |                 | C(1)-N(1)-U(1)       | 173.6(5)       |

**Figure S8:** The PXRD pattern of the bulk product from the synthesis of **1** in black, which also produces **7**. The calculated pattern from 100(2) K SC-XRD data of **1** is overlaid in blue, and **7** in green. The PXRD pattern of the metathesis product of KSCN and C<sub>4</sub>H<sub>12</sub>NCl, which forms as a secondary product in the unoptimized synthesis of **1**, is shown in red.

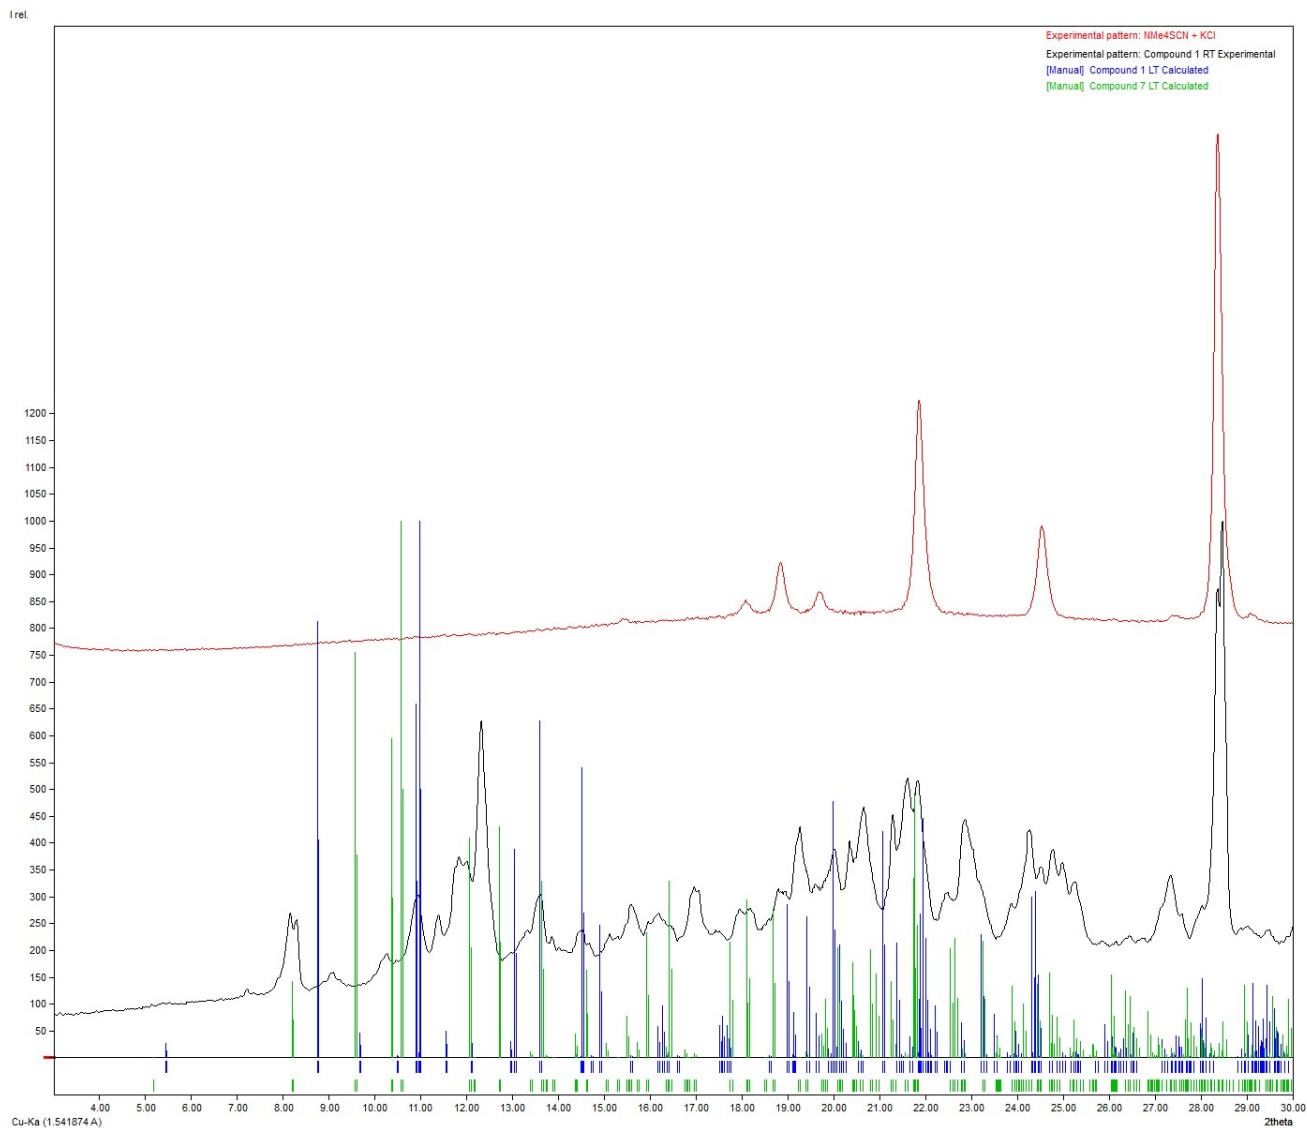

**Figure S9:** The PXRD pattern of the bulk product from the synthesis of **2** in black. The calculated pattern from 100(2) K SC-XRD data of **2** is overlaid in blue. The PXRD pattern of the metathesis product of KSCN and C<sub>4</sub>H<sub>12</sub>NCl, which forms as a secondary product in the unoptimized synthesis of **2**, is shown in red.

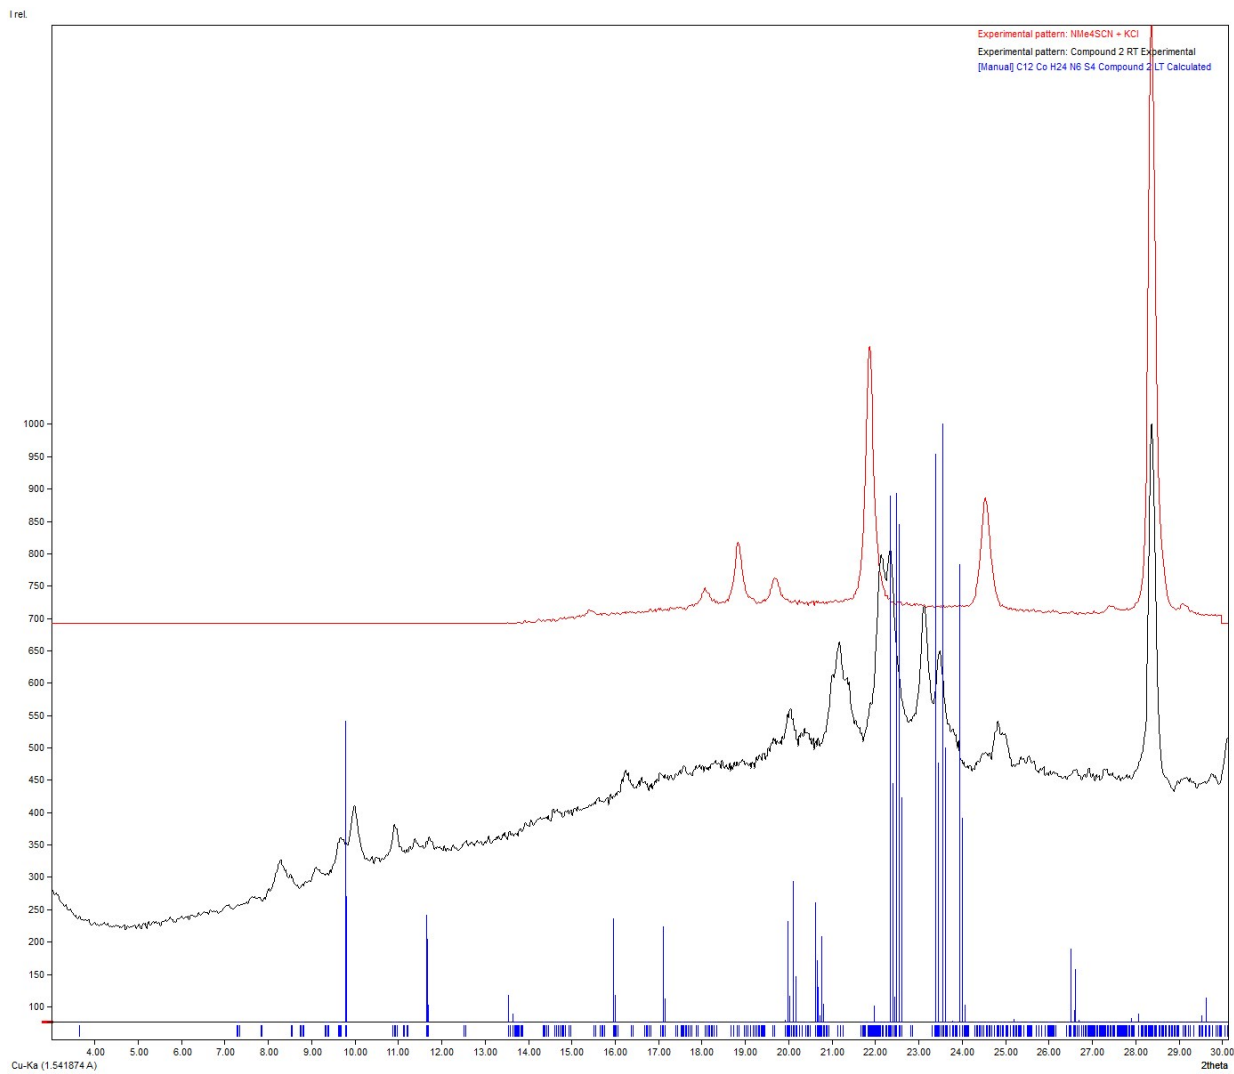

**Figure S10:** The PXRD pattern of the bulk product from the synthesis of **3** in black. The calculated pattern from 100(2) K SC-XRD data of **3** is overlaid in blue. The PXRD pattern of the metathesis product of KSCN and C<sub>4</sub>H<sub>12</sub>NCl, which forms as a secondary product in the unoptimized synthesis of **3**, is shown in red.

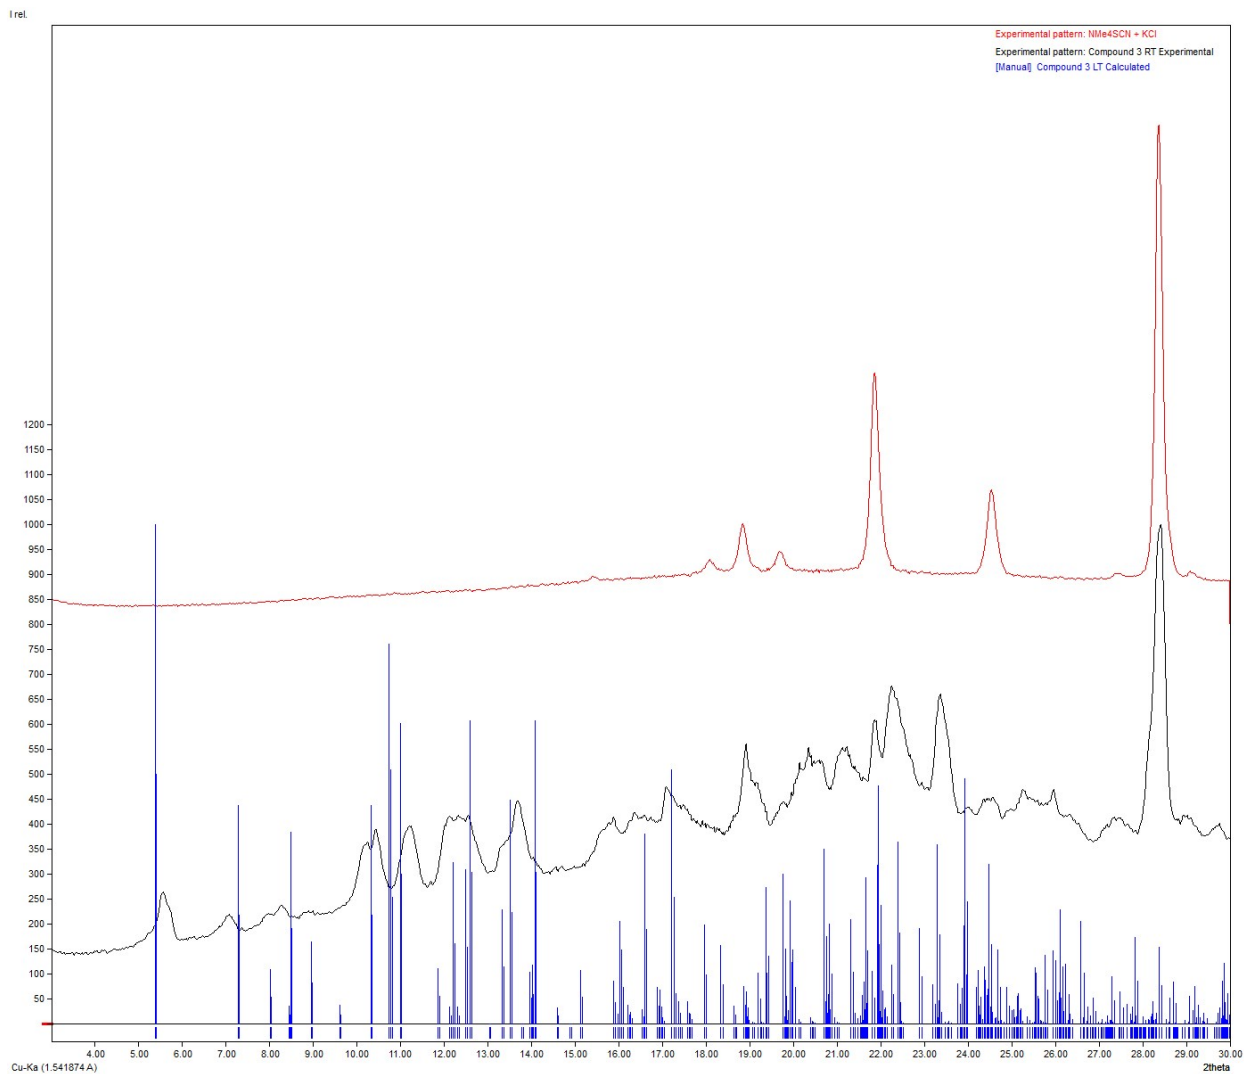

**Figure S11:** The PXRD pattern of the bulk product from the synthesis of **4** in black. The calculated pattern from 100(2) K SC-XRD data of **4** is overlaid in blue. The pattern of KCl is shown in green, which forms as a metathesis byproduct of excess KSCN and CsCl.

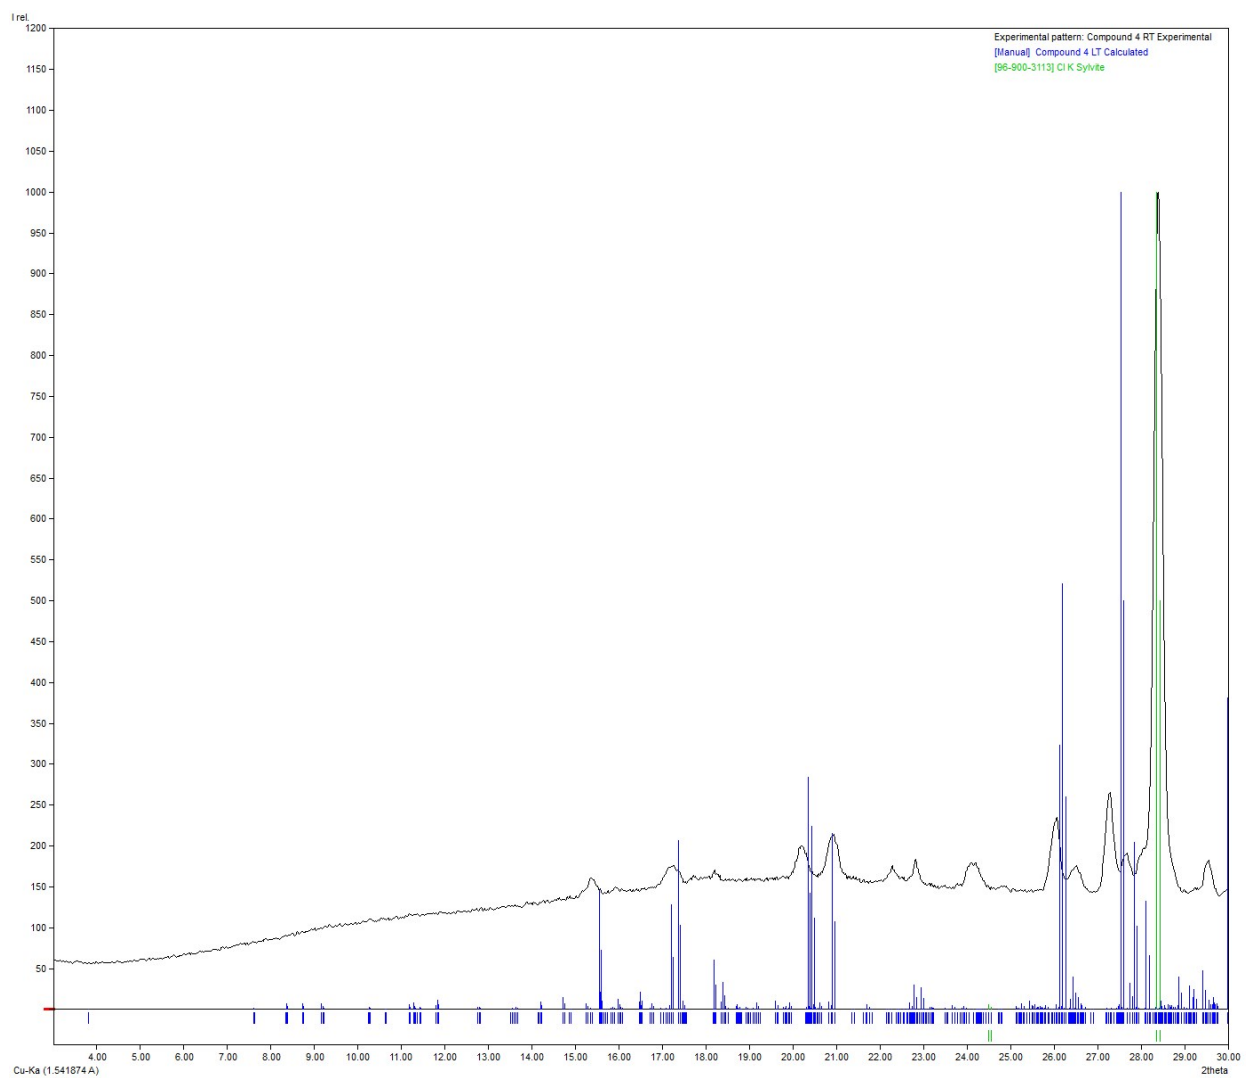



**Figure S12:** The PXRD pattern of the bulk product from the synthesis of **5** in black, which also produces known phase EDETEO.<sup>1</sup> The calculated pattern from 100(2) K SC-XRD data of **5** is overlaid in blue, and EDETEO in green. The PXRD pattern of the metathesis product of KSCN and C<sub>8</sub>H<sub>20</sub>NCl, which forms as a secondary product in the unoptimized synthesis of **5**, is shown in red.

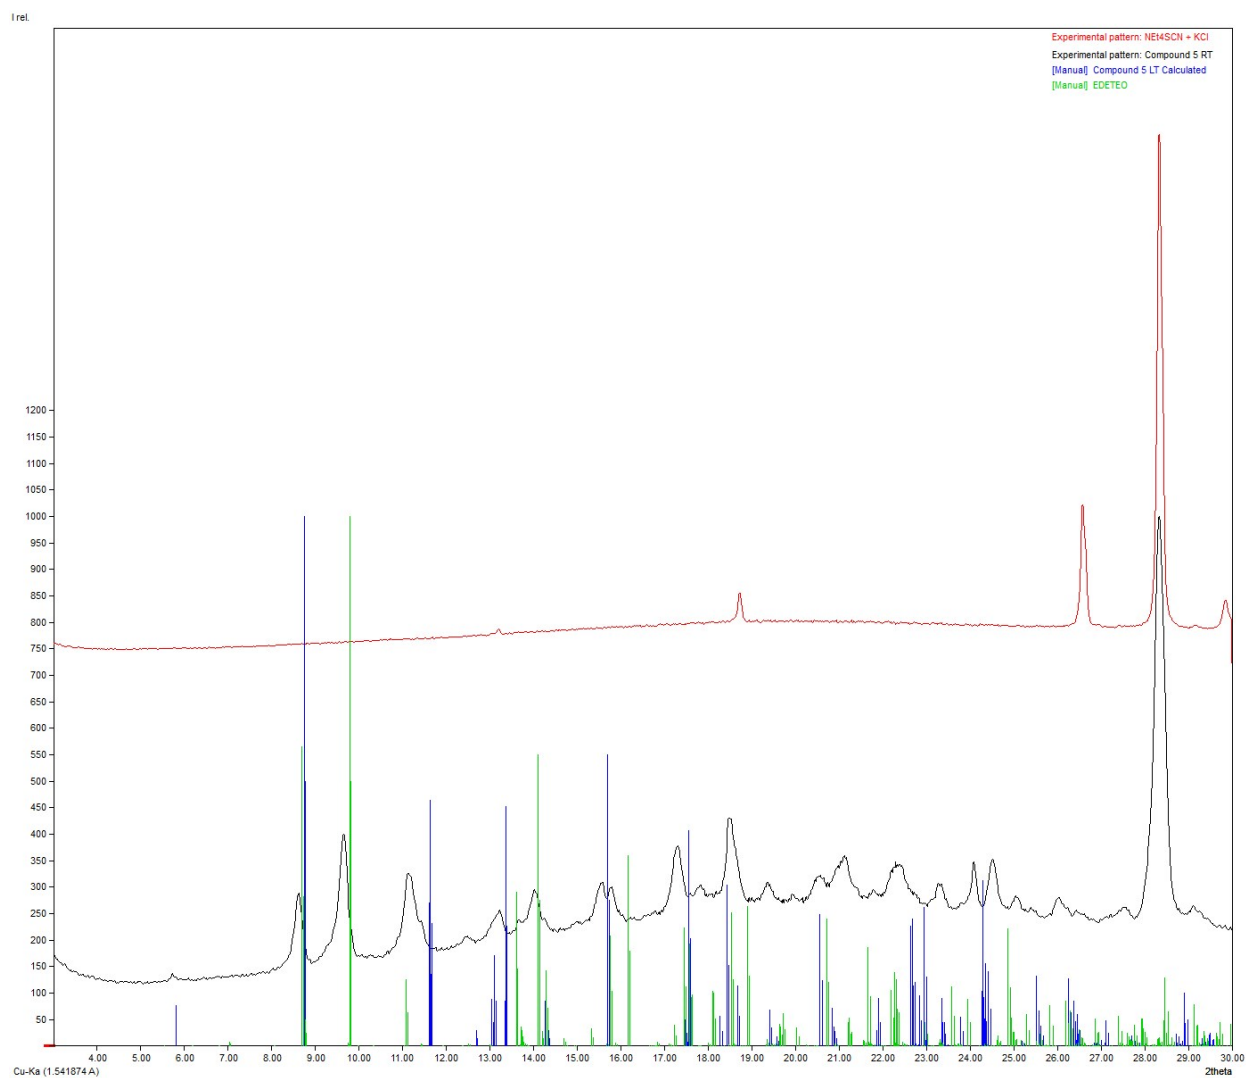

**Figure S13:** The PXRD pattern of the bulk product from the synthesis of **6** in black. The calculated pattern from 100(2) K SC-XRD data of **6** is overlaid in blue. The pattern of KCl is shown in green, which forms as a byproduct of KSCN and HCl.

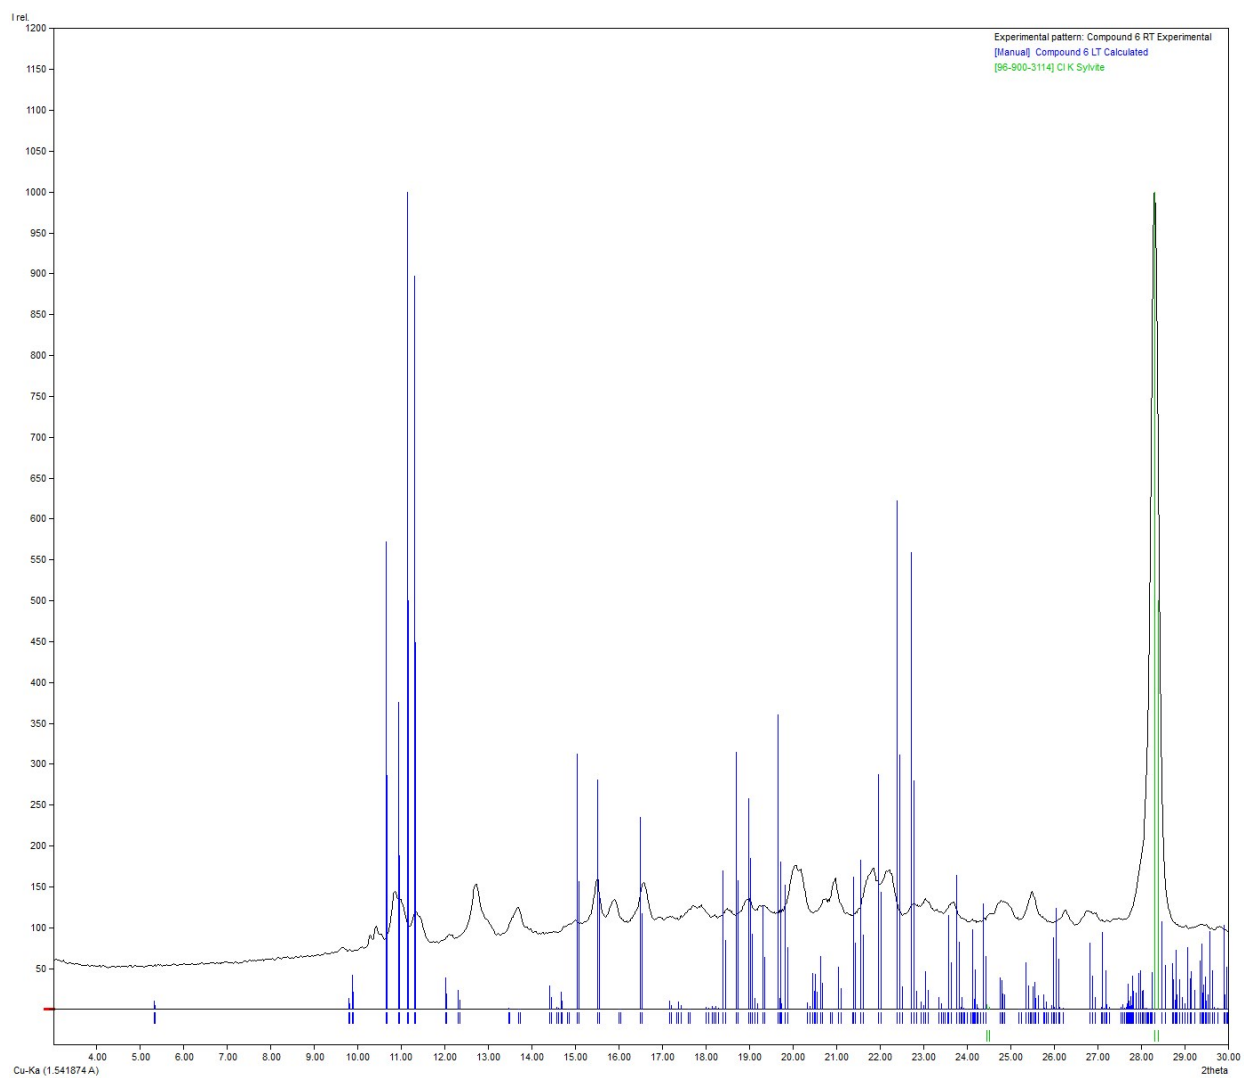

**Figure S14:** UV-Vis-DRS of compound **1** collected at room temperature.

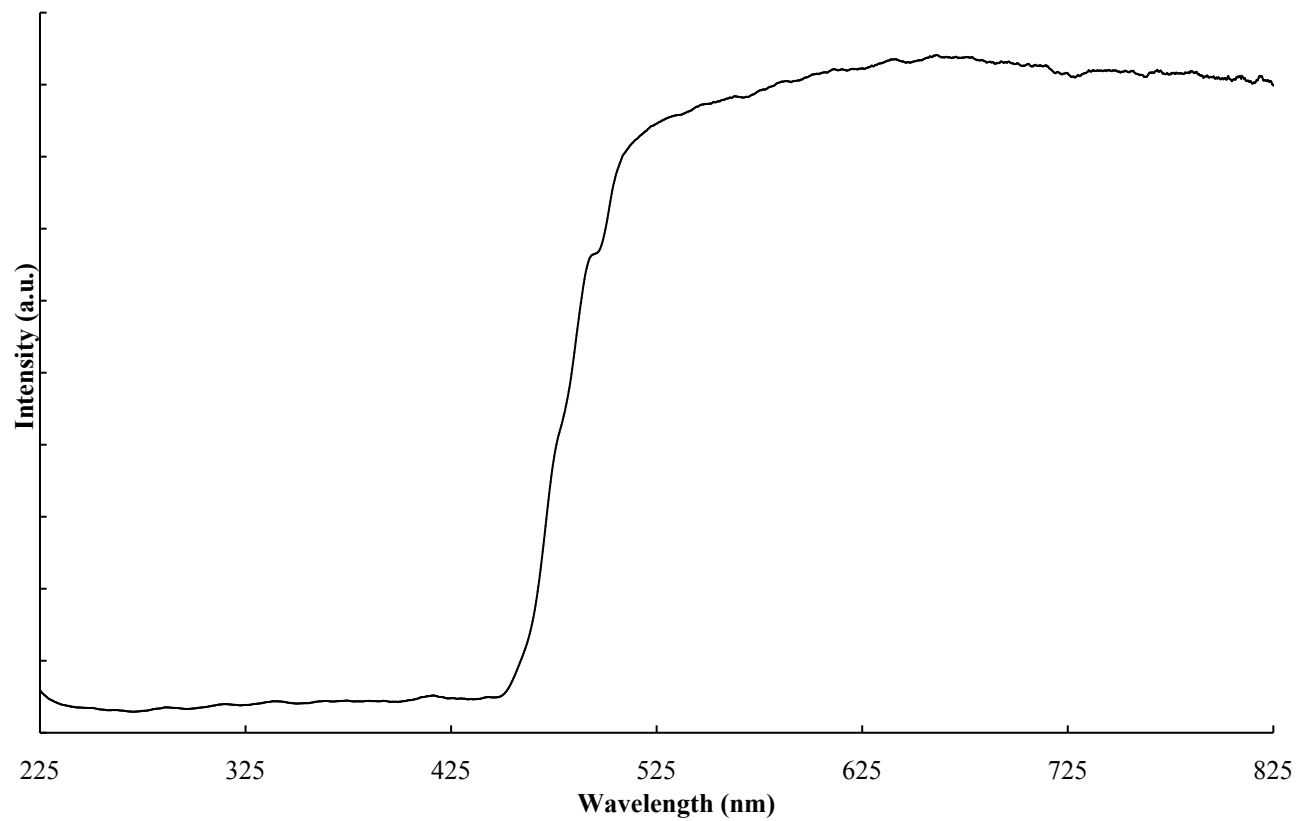

**Figure S15:** UV-Vis-DRS of compound **2** collected at room temperature.

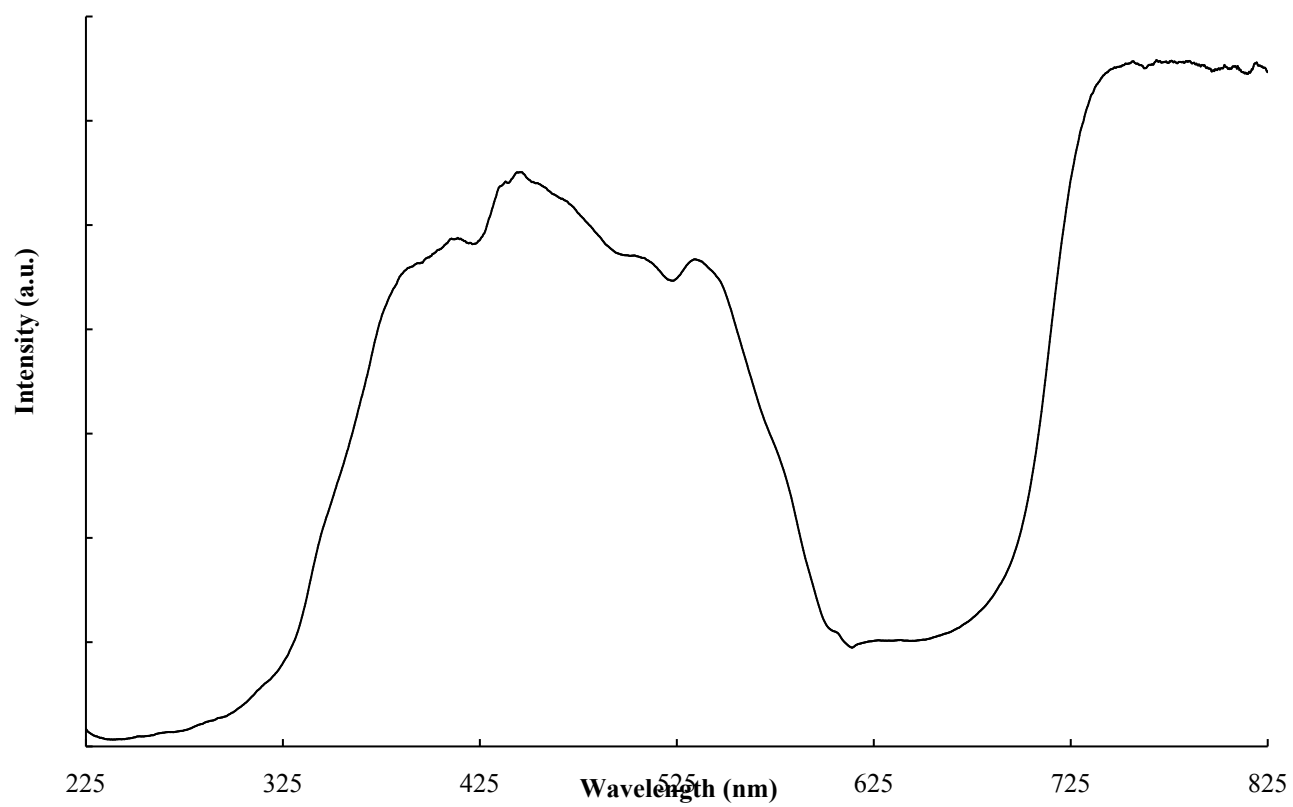

**Figure S16:** UV-Vis-DRS of compound **3** collected at room temperature.

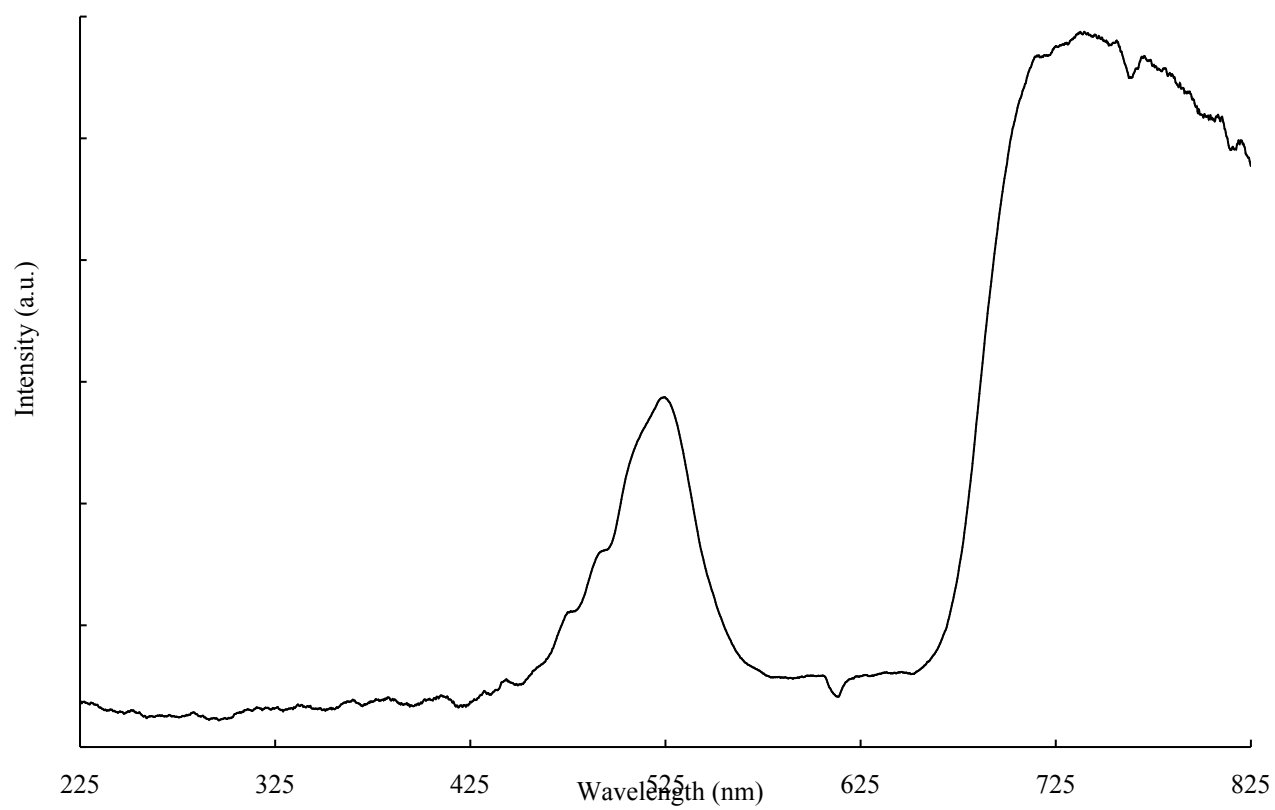

**Figure S17:** Room temperature Raman spectrum of compound **1**.

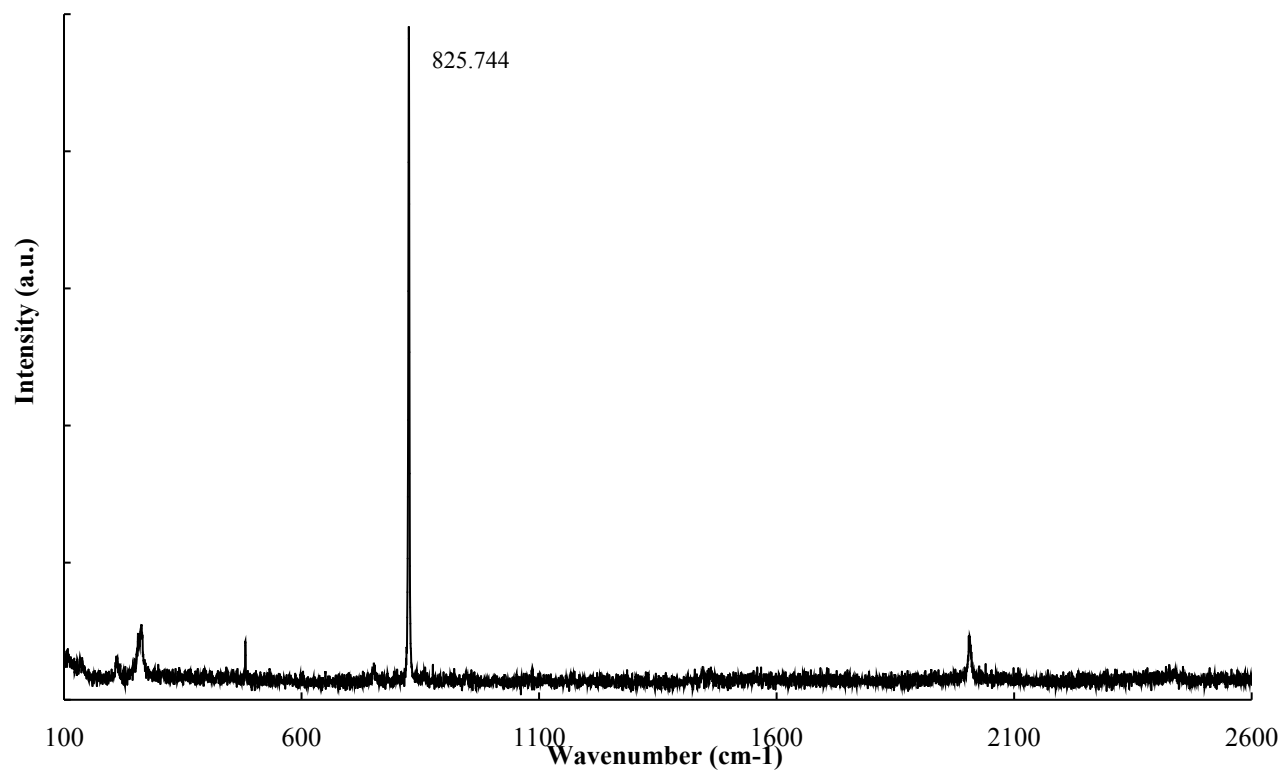

**Figure S18:** Room temperature Raman spectrum of compound **3**.

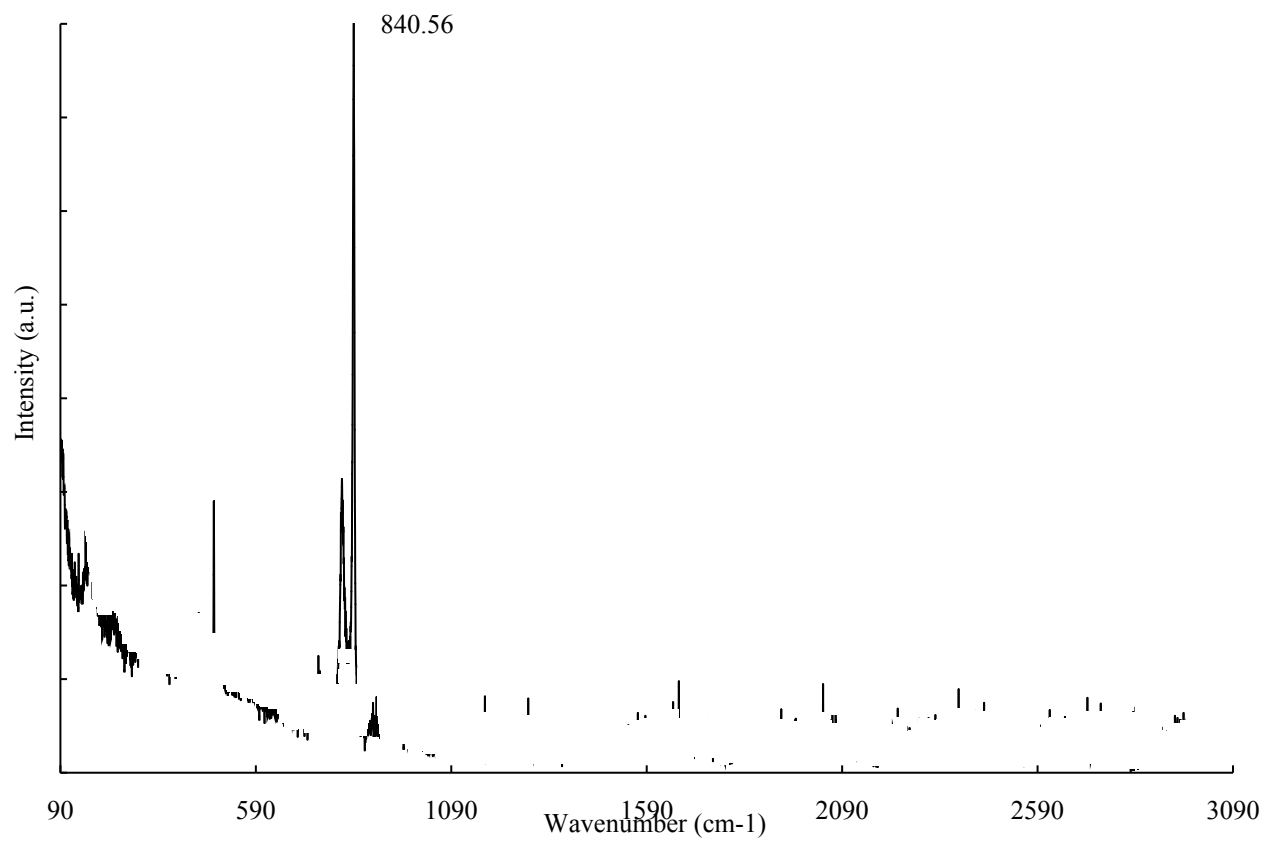

**Figure S19:** DFT calculated Raman spectra of (a) Model A, (b) Model B, (c)  $[\text{UO}_2(\text{NCS})_5]^{3-}$ , and (d)  $[\text{Co}(\text{NCS})_4]^{2-}$  using B3LYP, between  $200\text{ cm}^{-1}$  and  $1500\text{ cm}^{-1}$ .

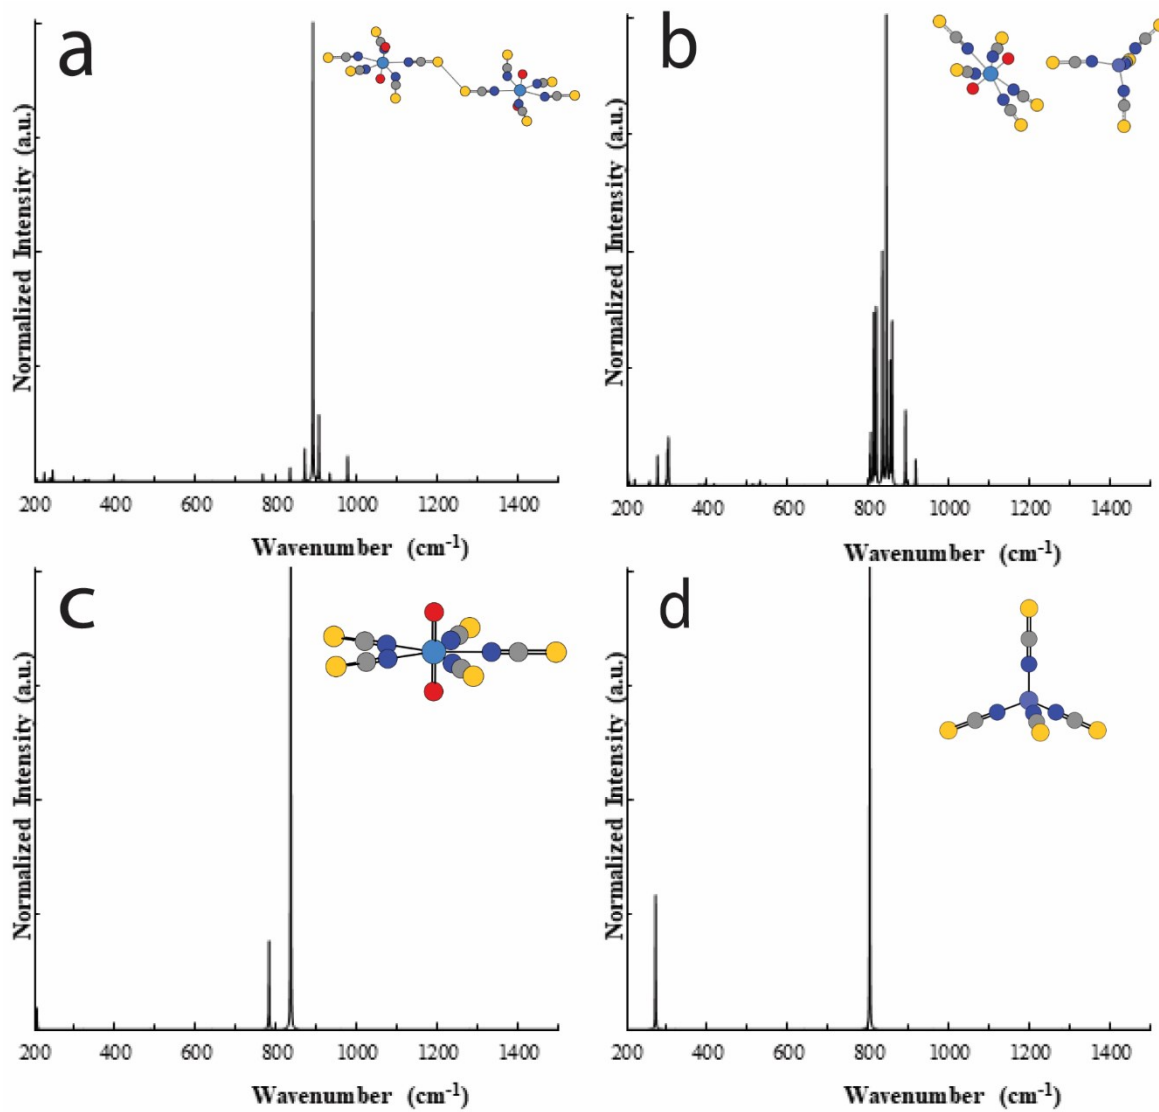



**Table S10:** Calculated Raman and IR frequencies and atomic displacements for Model A in the uranyl symmetric stretch region.

| Frequency       | 866   |       |       | 904   |       |       | 904.3 |       |       |
|-----------------|-------|-------|-------|-------|-------|-------|-------|-------|-------|
| IR Intensity    | 4.79  |       |       | 15.5  |       |       | 7E-04 |       |       |
| Raman Intensity | 4.42  |       |       | 0.01  |       |       | 104.6 |       |       |
|                 | X     | Y     | Z     | X     | Y     | Z     | X     | Y     | Z     |
| C               | 0.00  | 0.00  | 0.00  | 0.00  | 0.00  | 0.00  | 0.00  | 0.00  | 0.00  |
| C               | 0.00  | 0.00  | 0.00  | 0.00  | 0.00  | 0.00  | 0.00  | 0.00  | 0.00  |
| C               | 0.01  | 0.00  | 0.00  | 0.00  | 0.00  | 0.00  | 0.00  | 0.00  | 0.00  |
| C               | 0.33  | 0.36  | -0.13 | 0.00  | 0.00  | 0.00  | 0.00  | 0.00  | 0.00  |
| C               | 0.00  | -0.02 | -0.01 | -0.01 | 0.36  | 0.16  | 0.01  | -0.35 | -0.16 |
| N               | 0.00  | 0.00  | 0.00  | 0.00  | 0.00  | 0.00  | 0.00  | 0.00  | 0.00  |
| N               | 0.00  | 0.00  | 0.00  | 0.00  | -0.01 | 0.00  | 0.00  | 0.00  | 0.00  |
| N               | 0.01  | 0.00  | 0.00  | 0.00  | 0.00  | 0.00  | 0.00  | 0.00  | 0.00  |
| N               | 0.39  | 0.46  | -0.13 | 0.00  | 0.01  | 0.00  | 0.00  | -0.01 | 0.00  |
| N               | 0.00  | -0.02 | 0.00  | -0.03 | 0.47  | 0.09  | 0.03  | -0.46 | -0.09 |
| O               | 0.00  | 0.00  | 0.06  | -0.01 | 0.00  | 0.09  | 0.01  | 0.00  | -0.09 |
| O               | 0.01  | 0.00  | -0.06 | 0.01  | 0.00  | -0.13 | -0.01 | 0.00  | 0.12  |
| S               | 0.00  | 0.00  | 0.00  | 0.00  | 0.00  | 0.00  | 0.00  | 0.00  | 0.00  |
| S               | 0.00  | 0.00  | 0.00  | 0.00  | 0.00  | 0.00  | 0.00  | 0.00  | 0.00  |
| S               | -0.01 | 0.00  | 0.00  | 0.00  | 0.00  | 0.00  | 0.00  | 0.00  | 0.00  |
| S               | -0.26 | -0.29 | 0.11  | 0.00  | 0.00  | 0.00  | 0.00  | 0.00  | 0.00  |
| S               | 0.00  | 0.01  | 0.00  | 0.00  | -0.30 | -0.10 | 0.00  | 0.30  | 0.10  |
| U               | -0.01 | -0.01 | 0.00  | 0.00  | -0.01 | 0.00  | 0.00  | 0.01  | 0.00  |
| C               | 0.00  | 0.00  | 0.00  | 0.00  | 0.00  | 0.00  | 0.00  | 0.00  | 0.00  |
| C               | 0.00  | 0.00  | 0.00  | 0.00  | 0.00  | 0.00  | 0.00  | 0.00  | 0.00  |
| C               | 0.00  | 0.00  | 0.00  | 0.00  | 0.00  | 0.00  | 0.00  | 0.00  | 0.00  |
| C               | 0.16  | 0.18  | -0.07 | 0.00  | 0.00  | 0.00  | 0.00  | 0.00  | 0.00  |
| C               | 0.00  | -0.01 | 0.00  | -0.01 | 0.35  | 0.16  | -0.01 | 0.36  | 0.16  |
| N               | 0.00  | 0.00  | 0.00  | 0.00  | 0.00  | 0.00  | 0.00  | 0.00  | 0.00  |
| N               | 0.00  | 0.00  | 0.00  | 0.00  | -0.01 | 0.00  | 0.00  | 0.00  | 0.00  |
| N               | 0.00  | 0.00  | 0.00  | 0.00  | 0.00  | 0.00  | 0.00  | 0.00  | 0.00  |
| N               | 0.19  | 0.23  | -0.06 | 0.00  | 0.01  | 0.00  | 0.00  | 0.01  | 0.00  |
| N               | 0.00  | -0.01 | 0.00  | -0.03 | 0.46  | 0.09  | -0.03 | 0.47  | 0.09  |
| O               | 0.00  | 0.00  | 0.03  | -0.01 | 0.00  | 0.09  | -0.01 | 0.00  | 0.09  |
| O               | 0.00  | 0.00  | -0.03 | 0.01  | 0.00  | -0.12 | 0.01  | 0.00  | -0.12 |
| S               | 0.00  | 0.00  | 0.00  | 0.00  | 0.00  | 0.00  | 0.00  | 0.00  | 0.00  |
| S               | 0.00  | 0.00  | 0.00  | 0.00  | 0.00  | 0.00  | 0.00  | 0.00  | 0.00  |
| S               | 0.00  | 0.00  | 0.00  | 0.00  | 0.00  | 0.00  | 0.00  | 0.00  | 0.00  |
| S               | -0.13 | -0.14 | 0.05  | 0.00  | 0.00  | 0.00  | 0.00  | 0.00  | 0.00  |
| S               | 0.00  | 0.01  | 0.00  | 0.00  | -0.30 | -0.10 | 0.00  | -0.30 | -0.10 |
| U               | 0.00  | 0.00  | 0.00  | 0.00  | -0.01 | 0.00  | 0.00  | -0.01 | 0.00  |
| Frequency       | 925   |       |       | 925   |       |       | 940.7 |       |       |
| IR Intensity    | 25.3  |       |       | 0     |       |       | 0     |       |       |

| Raman Intensity | 0.06  |       |       | 337   |       |       | 212.5 |       |       |
|-----------------|-------|-------|-------|-------|-------|-------|-------|-------|-------|
|                 | X     | Y     | Z     | X     | Y     | Z     | X     | Y     | Z     |
| C               | 0.16  | 0.01  | 0.02  | -0.16 | -0.01 | -0.02 | 0.33  | 0.02  | 0.04  |
| C               | -0.01 | 0.03  | 0.00  | 0.01  | -0.03 | 0.00  | 0.01  | -0.05 | 0.00  |
| C               | 0.02  | 0.00  | 0.01  | -0.02 | 0.00  | -0.01 | -0.01 | 0.00  | 0.00  |
| C               | 0.02  | 0.03  | -0.01 | -0.02 | -0.03 | 0.01  | -0.01 | -0.02 | 0.01  |
| C               | 0.00  | 0.07  | 0.03  | 0.00  | -0.07 | -0.03 | 0.00  | -0.04 | -0.02 |
| N               | 0.22  | 0.02  | 0.04  | -0.22 | -0.02 | -0.04 | 0.43  | 0.04  | 0.07  |
| N               | -0.02 | 0.05  | 0.00  | 0.02  | -0.04 | 0.00  | 0.02  | -0.07 | -0.01 |
| N               | 0.02  | -0.01 | 0.00  | -0.02 | 0.01  | 0.00  | -0.01 | 0.01  | 0.00  |
| N               | 0.03  | 0.03  | 0.00  | -0.03 | -0.03 | 0.00  | -0.02 | -0.02 | 0.00  |
| N               | -0.02 | 0.09  | 0.01  | 0.01  | -0.08 | -0.01 | 0.01  | -0.05 | -0.01 |
| O               | 0.03  | 0.00  | -0.35 | -0.03 | 0.00  | 0.34  | -0.01 | 0.00  | 0.16  |
| O               | -0.05 | 0.00  | 0.51  | 0.05  | 0.00  | -0.50 | 0.03  | 0.00  | -0.27 |
| S               | -0.15 | -0.01 | -0.02 | 0.15  | 0.01  | 0.02  | -0.28 | -0.02 | -0.04 |
| S               | 0.01  | -0.04 | 0.00  | -0.01 | 0.04  | 0.00  | -0.01 | 0.05  | 0.00  |
| S               | -0.01 | 0.00  | 0.00  | 0.01  | 0.00  | 0.00  | 0.00  | 0.00  | 0.00  |
| S               | -0.01 | -0.02 | 0.01  | 0.01  | 0.01  | -0.01 | 0.01  | 0.01  | 0.00  |
| S               | 0.00  | -0.05 | -0.02 | 0.00  | 0.05  | 0.02  | 0.00  | 0.03  | 0.01  |
| U               | 0.00  | 0.00  | -0.01 | 0.00  | 0.00  | 0.01  | -0.01 | 0.00  | 0.01  |
| C               | 0.16  | 0.01  | 0.02  | 0.16  | 0.01  | 0.02  | -0.33 | -0.02 | -0.04 |
| C               | -0.01 | 0.03  | 0.00  | -0.01 | 0.03  | 0.00  | -0.01 | 0.05  | 0.00  |
| C               | 0.02  | 0.00  | 0.01  | 0.02  | 0.00  | 0.01  | 0.01  | 0.00  | 0.00  |
| C               | 0.02  | 0.03  | -0.01 | 0.02  | 0.03  | -0.01 | 0.01  | 0.02  | -0.01 |
| C               | 0.00  | 0.07  | 0.03  | 0.00  | 0.07  | 0.03  | 0.00  | 0.04  | 0.02  |
| N               | 0.22  | 0.02  | 0.04  | 0.22  | 0.02  | 0.04  | -0.43 | -0.04 | -0.07 |
| N               | -0.02 | 0.05  | 0.00  | -0.02 | 0.04  | 0.00  | -0.02 | 0.07  | 0.01  |
| N               | 0.02  | -0.01 | 0.00  | 0.02  | -0.01 | 0.00  | 0.01  | -0.01 | 0.00  |
| N               | 0.03  | 0.03  | 0.00  | 0.03  | 0.03  | 0.00  | 0.02  | 0.02  | 0.00  |
| N               | -0.02 | 0.09  | 0.01  | -0.01 | 0.09  | 0.01  | -0.01 | 0.05  | 0.01  |
| O               | 0.03  | 0.00  | -0.34 | 0.03  | 0.00  | -0.35 | 0.01  | 0.00  | -0.16 |
| O               | -0.05 | 0.00  | 0.50  | -0.05 | 0.00  | 0.51  | -0.03 | 0.00  | 0.27  |
| S               | -0.15 | -0.01 | -0.02 | -0.15 | -0.01 | -0.02 | 0.28  | 0.02  | 0.04  |
| S               | 0.01  | -0.04 | 0.00  | 0.01  | -0.04 | 0.00  | 0.01  | -0.05 | 0.00  |
| S               | -0.01 | 0.00  | 0.00  | -0.01 | 0.00  | 0.00  | 0.00  | 0.00  | 0.00  |
| S               | -0.01 | -0.01 | 0.01  | -0.01 | -0.01 | 0.01  | -0.01 | -0.01 | 0.00  |
| S               | 0.00  | -0.05 | -0.02 | 0.00  | -0.05 | -0.02 | 0.00  | -0.03 | -0.01 |
| U               | 0.00  | 0.00  | -0.01 | 0.00  | 0.00  | -0.01 | 0.01  | 0.00  | -0.01 |

**Table S11:** Calculated Raman and IR frequencies and atomic displacements for Model B in the uranyl symmetric stretch region.

| Frequency       | 834.75 |       |       | 836.84 |       |       | 844.96 |       |       |
|-----------------|--------|-------|-------|--------|-------|-------|--------|-------|-------|
| IR Intensity    | 0.9128 |       |       | 1.4715 |       |       | 14.826 |       |       |
| Raman Intensity | 21.7   |       |       | 35.225 |       |       | 54.788 |       |       |
|                 | X      | Y     | Z     | X      | Y     | Z     | X      | Y     | Z     |
| U               | 0.00   | -0.01 | 0.00  | -0.01  | 0.00  | 0.01  | 0.00   | 0.00  | 0.00  |
| Co              | 0.00   | 0.00  | 0.00  | 0.00   | 0.00  | 0.00  | 0.01   | -0.03 | -0.03 |
| S               | 0.00   | 0.00  | 0.00  | 0.00   | 0.00  | 0.00  | 0.00   | 0.00  | 0.00  |
| S               | 0.00   | 0.00  | 0.00  | 0.00   | 0.00  | 0.00  | 0.00   | -0.32 | -0.28 |
| S               | 0.00   | 0.00  | 0.00  | 0.00   | 0.00  | 0.00  | -0.02  | 0.01  | -0.02 |
| S               | 0.00   | 0.00  | 0.00  | 0.00   | 0.00  | 0.00  | 0.00   | 0.00  | 0.00  |
| S               | -0.03  | 0.01  | 0.02  | -0.32  | 0.11  | 0.28  | 0.00   | 0.00  | 0.00  |
| S               | 0.21   | -0.36 | -0.15 | -0.02  | 0.04  | 0.02  | 0.00   | -0.01 | 0.00  |
| S               | 0.00   | 0.00  | 0.00  | 0.00   | 0.00  | 0.00  | 0.00   | 0.00  | 0.00  |
| S               | 0.02   | 0.03  | -0.02 | 0.01   | 0.02  | -0.01 | -0.05  | -0.08 | 0.05  |
| S               | 0.00   | 0.00  | 0.00  | 0.00   | 0.00  | 0.00  | 0.00   | 0.00  | 0.00  |
| O               | -0.08  | 0.01  | -0.07 | -0.07  | 0.01  | -0.08 | -0.03  | 0.00  | -0.03 |
| O               | 0.07   | 0.00  | 0.07  | 0.07   | -0.01 | 0.06  | 0.03   | 0.00  | 0.03  |
| N               | 0.00   | 0.00  | 0.00  | 0.00   | 0.00  | 0.00  | 0.00   | 0.00  | 0.00  |
| N               | 0.00   | 0.00  | 0.00  | 0.00   | 0.00  | 0.00  | 0.03   | -0.01 | 0.03  |
| N               | 0.00   | 0.00  | 0.00  | 0.00   | 0.00  | 0.00  | 0.00   | -0.01 | 0.00  |
| N               | 0.00   | 0.00  | 0.00  | 0.00   | 0.00  | 0.00  | -0.04  | 0.50  | 0.44  |
| N               | 0.00   | 0.00  | 0.00  | 0.00   | 0.01  | 0.00  | 0.00   | 0.00  | 0.00  |
| N               | -0.30  | 0.55  | 0.24  | 0.03   | -0.06 | -0.03 | -0.01  | 0.01  | 0.00  |
| N               | -0.03  | -0.05 | 0.03  | -0.02  | -0.04 | 0.02  | 0.08   | 0.12  | -0.07 |
| N               | 0.04   | -0.01 | -0.04 | 0.48   | -0.17 | -0.44 | 0.00   | 0.00  | 0.00  |
| N               | 0.01   | 0.01  | -0.01 | 0.00   | 0.00  | 0.00  | 0.00   | 0.00  | 0.00  |
| C               | 0.00   | 0.00  | 0.00  | 0.00   | 0.00  | 0.00  | 0.00   | 0.00  | 0.00  |
| C               | 0.00   | 0.00  | 0.00  | 0.00   | 0.00  | 0.00  | 0.01   | 0.42  | 0.38  |
| C               | 0.00   | 0.00  | 0.00  | 0.00   | 0.00  | 0.00  | 0.00   | 0.00  | 0.00  |
| C               | 0.00   | 0.00  | 0.00  | 0.00   | 0.00  | 0.00  | 0.02   | -0.01 | 0.03  |
| C               | 0.01   | 0.01  | -0.01 | 0.00   | 0.00  | 0.00  | 0.00   | 0.00  | 0.00  |
| C               | 0.00   | 0.00  | 0.00  | 0.00   | 0.01  | 0.00  | 0.00   | 0.00  | 0.00  |
| C               | 0.03   | -0.01 | -0.03 | 0.41   | -0.13 | -0.36 | 0.00   | 0.00  | 0.00  |
| C               | -0.27  | 0.46  | 0.19  | 0.03   | -0.05 | -0.02 | 0.00   | 0.01  | 0.00  |
| C               | -0.02  | -0.04 | 0.02  | -0.02  | -0.03 | 0.02  | 0.06   | 0.10  | -0.05 |
| Frequency       | 845.1  |       |       | 851.02 |       |       | 866.76 |       |       |
| IR Intensity    | 1.8503 |       |       | 27.352 |       |       | 2.1718 |       |       |
| Raman Intensity | 58.058 |       |       | 113.9  |       |       | 184.8  |       |       |
|                 | X      | Y     | Z     | X      | Y     | Z     | X      | Y     | Z     |
| U               | 0.00   | -0.01 | 0.00  | 0.00   | 0.00  | 0.00  | 0.01   | 0.00  | 0.00  |
| Co              | 0.00   | 0.01  | 0.01  | -0.03  | 0.01  | -0.04 | 0.00   | 0.00  | 0.00  |
| S               | 0.00   | 0.00  | 0.00  | 0.00   | 0.00  | 0.00  | 0.00   | 0.00  | 0.00  |

|                 |       |        |       |       |        |       |       |        |       |
|-----------------|-------|--------|-------|-------|--------|-------|-------|--------|-------|
| S               | 0.00  | 0.08   | 0.07  | 0.00  | 0.02   | 0.02  | 0.00  | 0.00   | 0.00  |
| S               | 0.01  | 0.00   | 0.01  | -0.27 | 0.09   | -0.32 | 0.00  | 0.00   | 0.00  |
| S               | 0.00  | 0.00   | 0.00  | 0.01  | 0.00   | 0.00  | 0.00  | 0.00   | 0.00  |
| S               | -0.01 | 0.00   | 0.01  | 0.00  | 0.00   | 0.00  | 0.03  | -0.01  | -0.02 |
| S               | 0.01  | -0.02  | -0.01 | 0.00  | 0.00   | 0.00  | -0.01 | 0.02   | 0.01  |
| S               | 0.00  | 0.00   | 0.00  | 0.00  | 0.00   | 0.00  | 0.23  | 0.18   | -0.24 |
| S               | -0.20 | -0.33  | 0.19  | 0.00  | 0.00   | 0.00  | 0.02  | 0.04   | -0.02 |
| S               | 0.00  | 0.01   | 0.00  | 0.00  | 0.00   | 0.00  | 0.01  | 0.05   | 0.00  |
| O               | -0.11 | 0.01   | -0.11 | 0.00  | 0.00   | 0.00  | -0.28 | 0.03   | -0.27 |
| O               | 0.10  | -0.01  | 0.10  | 0.00  | 0.00   | 0.00  | 0.24  | -0.03  | 0.24  |
| N               | 0.00  | 0.00   | 0.00  | -0.01 | 0.00   | 0.00  | 0.00  | 0.00   | 0.00  |
| N               | -0.01 | 0.00   | -0.01 | 0.42  | -0.14  | 0.53  | 0.00  | 0.00   | 0.00  |
| N               | 0.00  | 0.00   | 0.00  | 0.00  | 0.00   | 0.00  | 0.00  | 0.00   | 0.00  |
| N               | 0.01  | -0.13  | -0.11 | 0.00  | -0.03  | -0.03 | 0.00  | 0.00   | 0.00  |
| N               | 0.00  | -0.01  | 0.00  | 0.00  | 0.00   | 0.00  | -0.02 | -0.07  | -0.01 |
| N               | -0.02 | 0.03   | 0.01  | 0.00  | 0.00   | 0.00  | 0.02  | -0.04  | -0.02 |
| N               | 0.31  | 0.50   | -0.30 | 0.00  | 0.00   | 0.00  | -0.04 | -0.06  | 0.04  |
| N               | 0.02  | -0.01  | -0.02 | 0.00  | 0.00   | 0.00  | -0.04 | 0.02   | 0.04  |
| N               | -0.01 | 0.00   | 0.01  | 0.00  | 0.00   | 0.00  | -0.36 | -0.26  | 0.37  |
| C               | 0.00  | 0.00   | 0.00  | -0.01 | 0.00   | 0.00  | 0.00  | 0.00   | 0.00  |
| C               | 0.00  | -0.11  | -0.10 | 0.00  | -0.03  | -0.03 | 0.00  | 0.00   | 0.00  |
| C               | 0.00  | 0.00   | 0.00  | 0.00  | 0.00   | 0.00  | 0.00  | 0.00   | 0.00  |
| C               | -0.01 | 0.00   | -0.01 | 0.37  | -0.13  | 0.43  | 0.00  | 0.00   | 0.00  |
| C               | 0.00  | 0.00   | 0.00  | 0.00  | 0.00   | 0.00  | -0.29 | -0.23  | 0.29  |
| C               | 0.00  | 0.00   | 0.00  | 0.00  | 0.00   | 0.00  | 0.00  | -0.05  | 0.00  |
| C               | 0.02  | -0.01  | -0.01 | 0.00  | 0.00   | 0.00  | -0.04 | 0.01   | 0.04  |
| C               | -0.01 | 0.02   | 0.01  | 0.00  | 0.00   | 0.00  | 0.02  | -0.03  | -0.01 |
| C               | 0.23  | 0.41   | -0.21 | 0.00  | 0.00   | 0.00  | -0.03 | -0.06  | 0.03  |
| Frequency       |       | 877.14 |       |       | 886.84 |       |       | 891.86 |       |
| IR Intensity    |       | 0.2943 |       |       | 13.434 |       |       | 0.7567 |       |
| Raman Intensity |       | 325.84 |       |       | 86.645 |       |       | 112.9  |       |
|                 | X     | Y      | Z     | X     | Y      | Z     | X     | Y      | Z     |
| U               | 0.00  | 0.00   | 0.00  | 0.00  | 0.00   | 0.00  | 0.00  | -0.01  | 0.00  |
| Co              | 0.00  | 0.00   | 0.00  | -0.01 | -0.05  | 0.02  | 0.00  | 0.00   | 0.00  |
| S               | 0.00  | 0.00   | 0.00  | -0.04 | -0.40  | 0.13  | 0.00  | -0.01  | 0.00  |
| S               | 0.00  | 0.00   | 0.00  | 0.00  | 0.00   | 0.00  | 0.00  | 0.00   | 0.00  |
| S               | 0.00  | 0.00   | 0.00  | 0.00  | 0.00   | 0.00  | 0.00  | 0.00   | 0.00  |
| S               | 0.01  | 0.00   | 0.00  | 0.00  | 0.00   | 0.00  | 0.00  | 0.00   | 0.00  |
| S               | -0.03 | 0.01   | 0.03  | 0.00  | 0.00   | 0.00  | 0.02  | -0.01  | -0.02 |
| S               | 0.02  | -0.03  | -0.01 | 0.00  | 0.00   | 0.00  | -0.01 | 0.02   | 0.01  |
| S               | 0.13  | 0.10   | -0.13 | 0.00  | 0.00   | 0.00  | -0.05 | -0.04  | 0.06  |
| S               | -0.02 | -0.04  | 0.02  | 0.00  | 0.00   | 0.00  | 0.02  | 0.03   | -0.01 |
| S               | -0.05 | -0.24  | -0.02 | 0.00  | 0.01   | 0.00  | -0.08 | -0.36  | -0.03 |
| O               | 0.35  | -0.04  | 0.35  | 0.00  | 0.00   | 0.00  | -0.27 | 0.03   | -0.27 |
| O               | -0.31 | 0.03   | -0.31 | 0.00  | 0.00   | 0.00  | 0.23  | -0.02  | 0.23  |

|   |       |       |       |      |       |       |       |       |       |
|---|-------|-------|-------|------|-------|-------|-------|-------|-------|
| N | -0.01 | 0.00  | 0.00  | 0.00 | 0.00  | 0.00  | 0.01  | 0.00  | 0.00  |
| N | 0.00  | 0.00  | 0.00  | 0.00 | 0.00  | 0.00  | 0.00  | 0.00  | 0.00  |
| N | 0.00  | 0.01  | 0.00  | 0.10 | 0.67  | -0.23 | 0.00  | 0.01  | 0.00  |
| N | 0.00  | 0.00  | 0.00  | 0.00 | 0.00  | 0.00  | 0.00  | 0.00  | 0.00  |
| N | 0.09  | 0.37  | 0.03  | 0.00 | -0.02 | 0.00  | 0.13  | 0.59  | 0.05  |
| N | -0.03 | 0.06  | 0.03  | 0.00 | 0.00  | 0.00  | 0.02  | -0.04 | -0.02 |
| N | 0.04  | 0.08  | -0.04 | 0.00 | 0.00  | 0.00  | -0.03 | -0.05 | 0.03  |
| N | 0.05  | -0.02 | -0.05 | 0.00 | 0.00  | 0.00  | -0.05 | 0.02  | 0.04  |
| N | -0.21 | -0.15 | 0.22  | 0.00 | 0.00  | 0.00  | 0.09  | 0.06  | -0.10 |
| C | 0.00  | 0.00  | 0.00  | 0.00 | 0.00  | 0.00  | 0.00  | 0.00  | 0.00  |
| C | 0.00  | 0.00  | 0.00  | 0.00 | 0.00  | 0.00  | 0.00  | 0.00  | 0.00  |
| C | 0.00  | 0.01  | 0.00  | 0.05 | 0.52  | -0.18 | 0.00  | 0.01  | 0.00  |
| C | 0.00  | 0.00  | 0.00  | 0.00 | 0.00  | 0.00  | 0.00  | 0.00  | 0.00  |
| C | -0.18 | -0.14 | 0.18  | 0.00 | 0.00  | 0.00  | 0.08  | 0.06  | -0.08 |
| C | 0.03  | 0.26  | 0.01  | 0.00 | -0.01 | 0.00  | 0.06  | 0.43  | 0.02  |
| C | 0.05  | -0.02 | -0.04 | 0.00 | 0.00  | 0.00  | -0.04 | 0.01  | 0.04  |
| C | -0.03 | 0.06  | 0.02  | 0.00 | 0.00  | 0.00  | 0.02  | -0.04 | -0.02 |
| C | 0.04  | 0.06  | -0.03 | 0.00 | 0.00  | 0.00  | -0.02 | -0.04 | 0.02  |

**Figure S20:** Room temperature IR spectra of compound **1**.

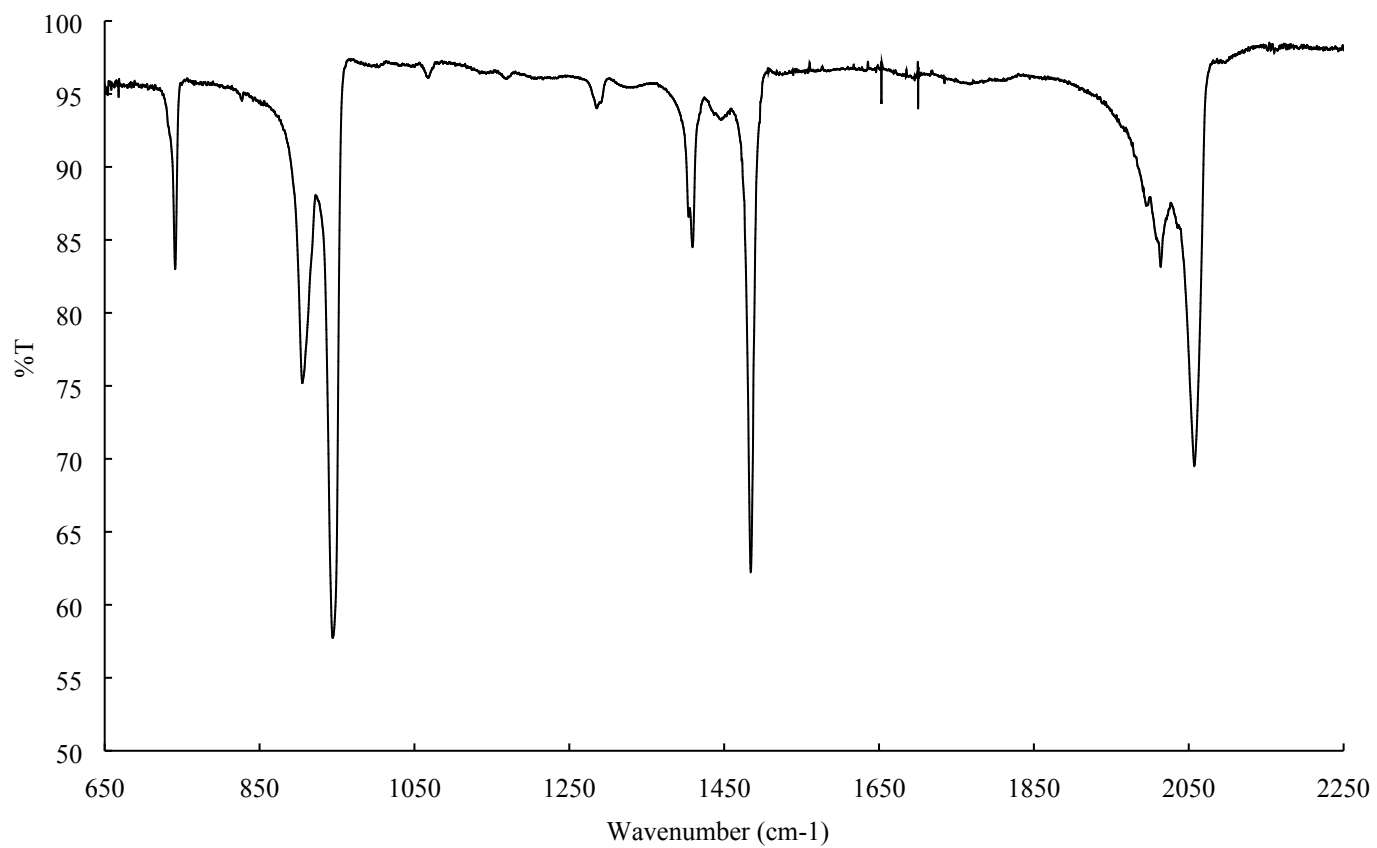

**Figure 21:** Room temperature IR spectra of compound **3**.

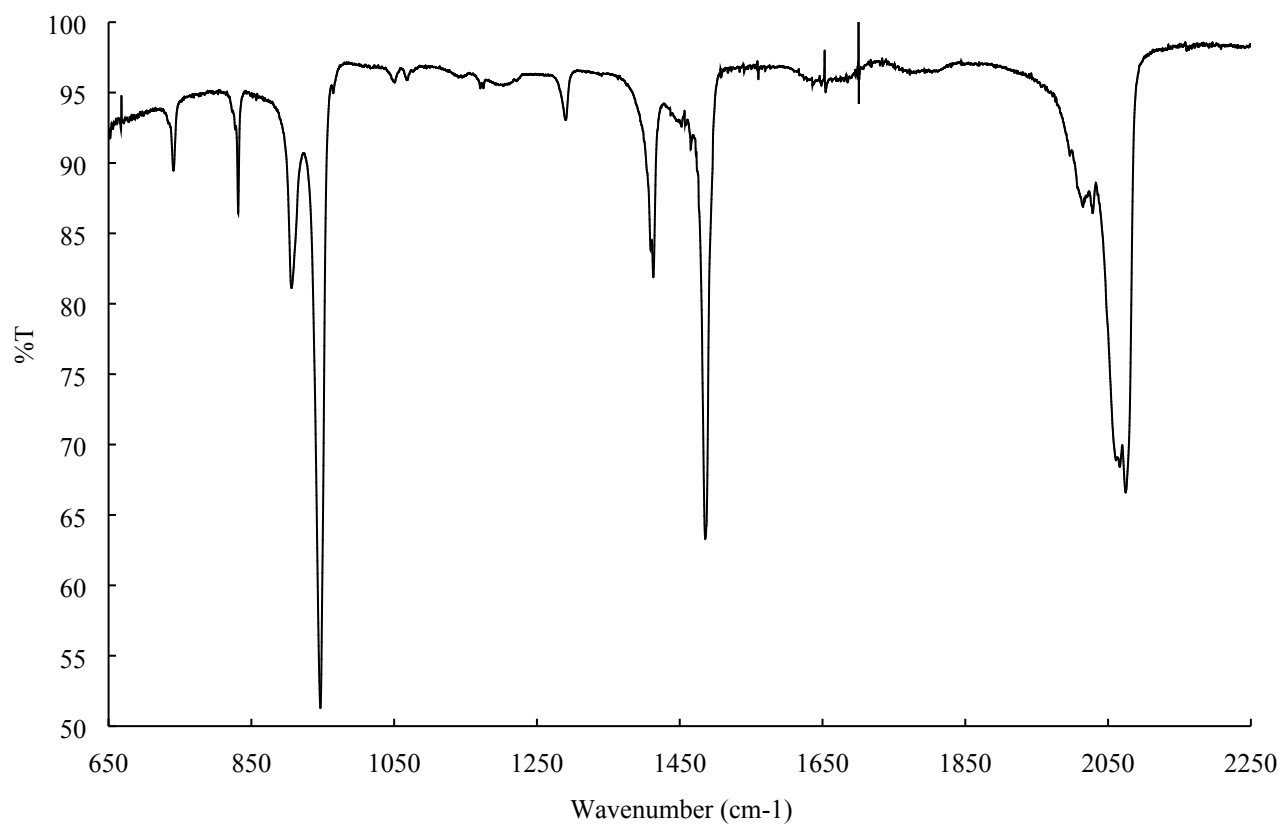

**Figure 22:** Isodensity representation of the HOMO and LUMOs present in the geometry optimized  $[\text{UO}_2(\text{NCS})_5]^{3-}$  anion.

HOMO

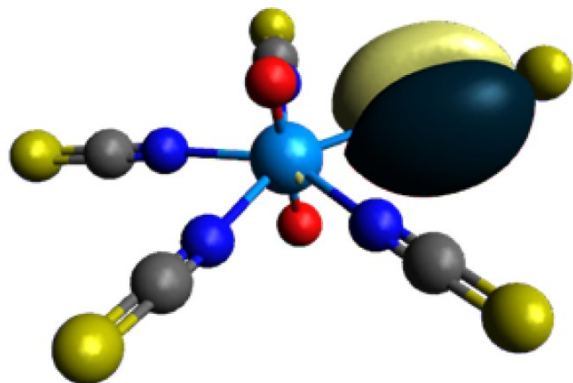

LUMO

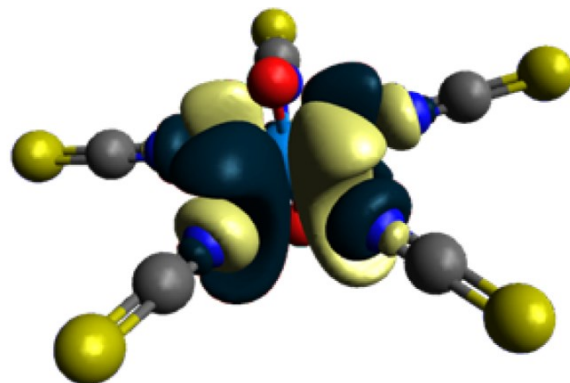



**Figure S23:** Isodensity representation of the HOMO and LUMOs present in the geometry optimized  $[\text{Co}(\text{NCS})_4]^{2-}$  anion.

HOMO

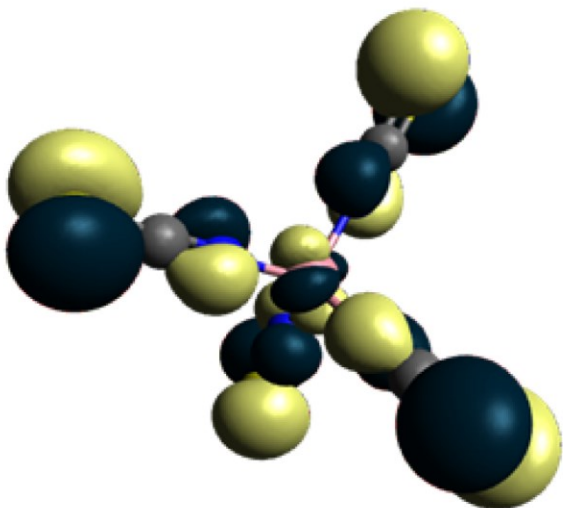

LUMO

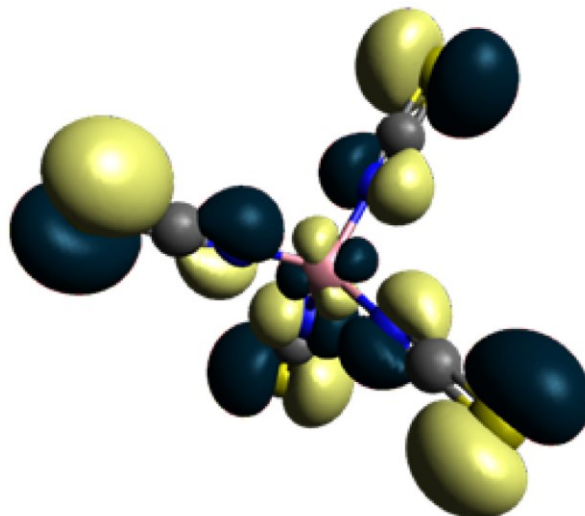

**Figure S24:** Homometallic  $[\text{UO}_2(\text{NCS})_5]^{6-}$  Model A, exhibiting S...S interactions between uranyl units, with relevant atoms labeled.

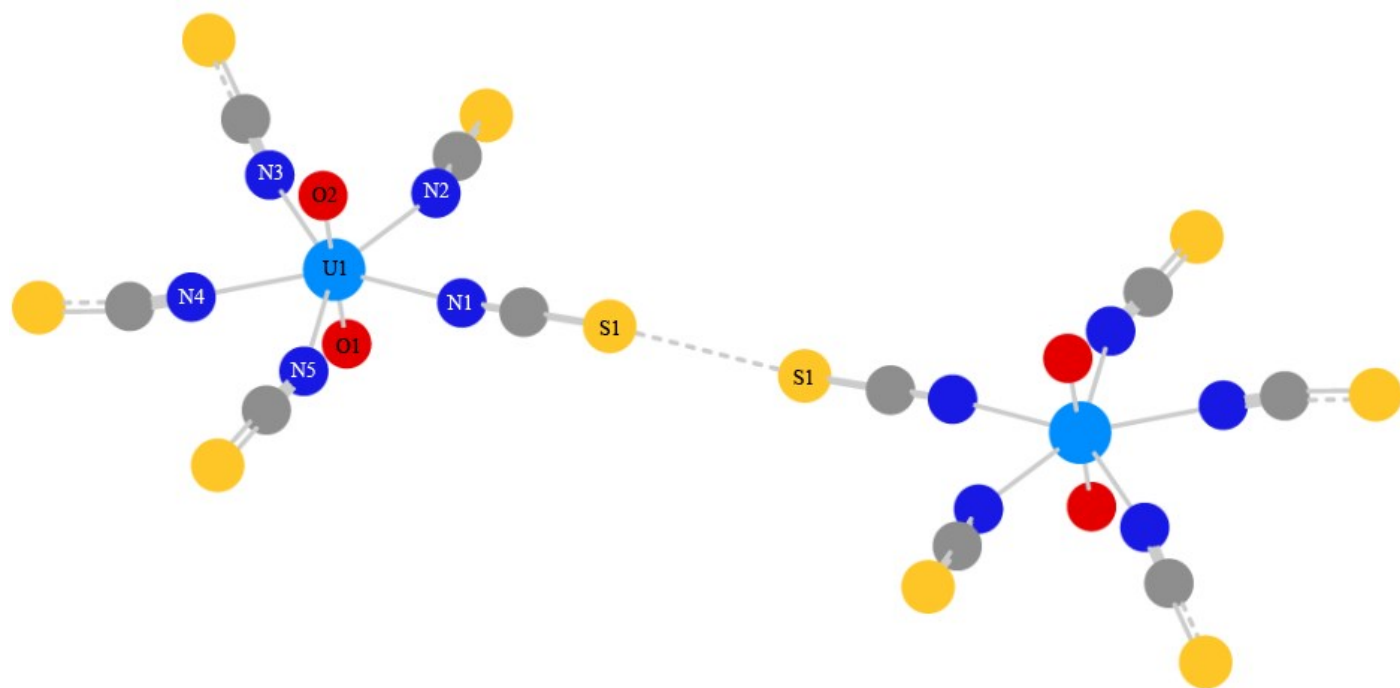

**Figure S25:** Heterometallic  $[(\text{Co}(\text{NCS})_4)(\text{UO}_2(\text{NCS})_5)]^{5-}$  Model B, exhibiting  $\text{S}\cdots\text{O}_{y1}$  interactions between  $[\text{UO}_2(\text{NCS})_5]^{3-}$  and  $[\text{Co}(\text{NCS})_4]^{2-}$  units, with relevant atoms labeled.

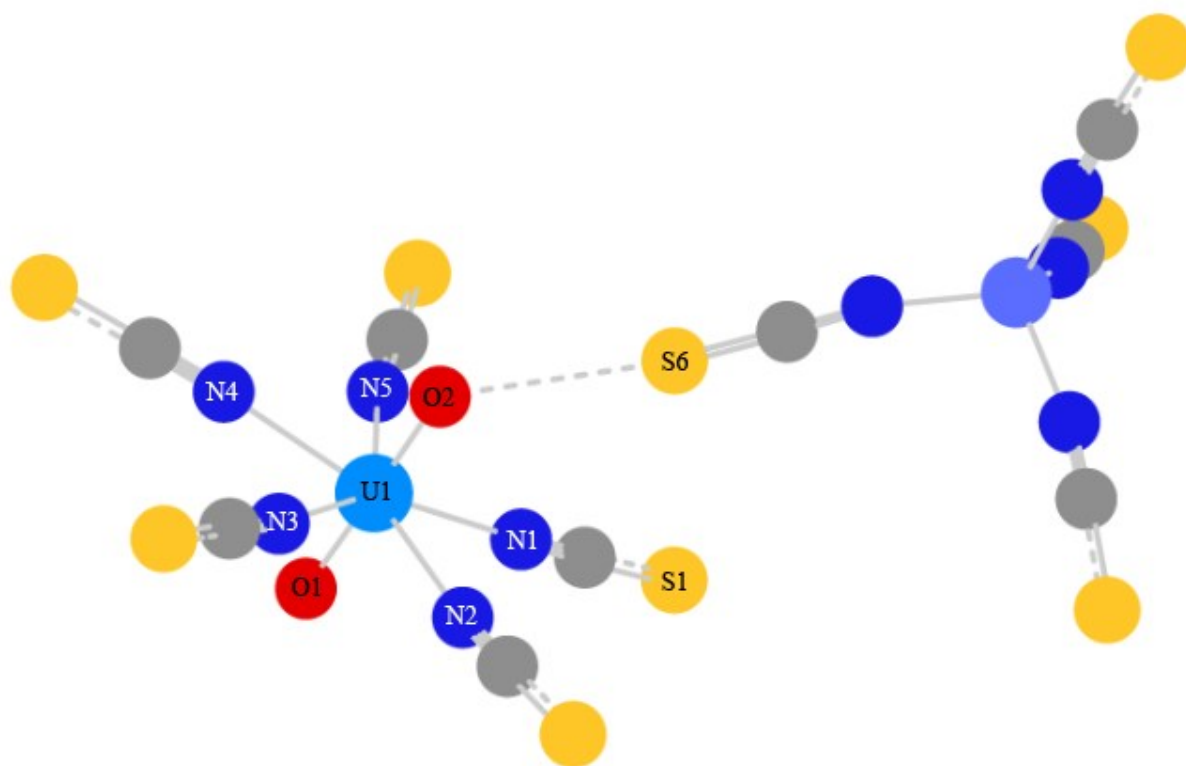

**Figure S26:** Isodensity representation of natural localized molecular orbital (NLMOs) involved in a U=O  $\pi$ -bonding interaction, common to both Model A and Model B.

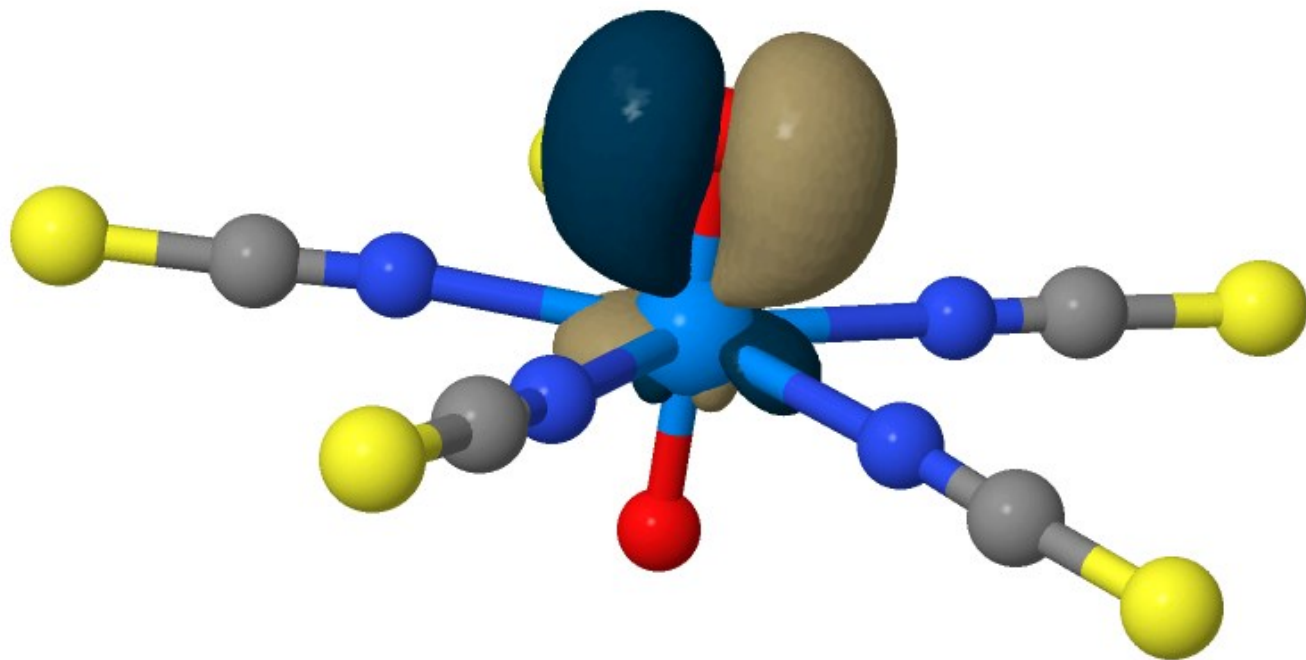

**Figure S27:** Isodensity representation of natural localized molecular orbital (NLMOs) involved in a U=O  $\pi$ -bonding interaction, common to both Model A and Model B.

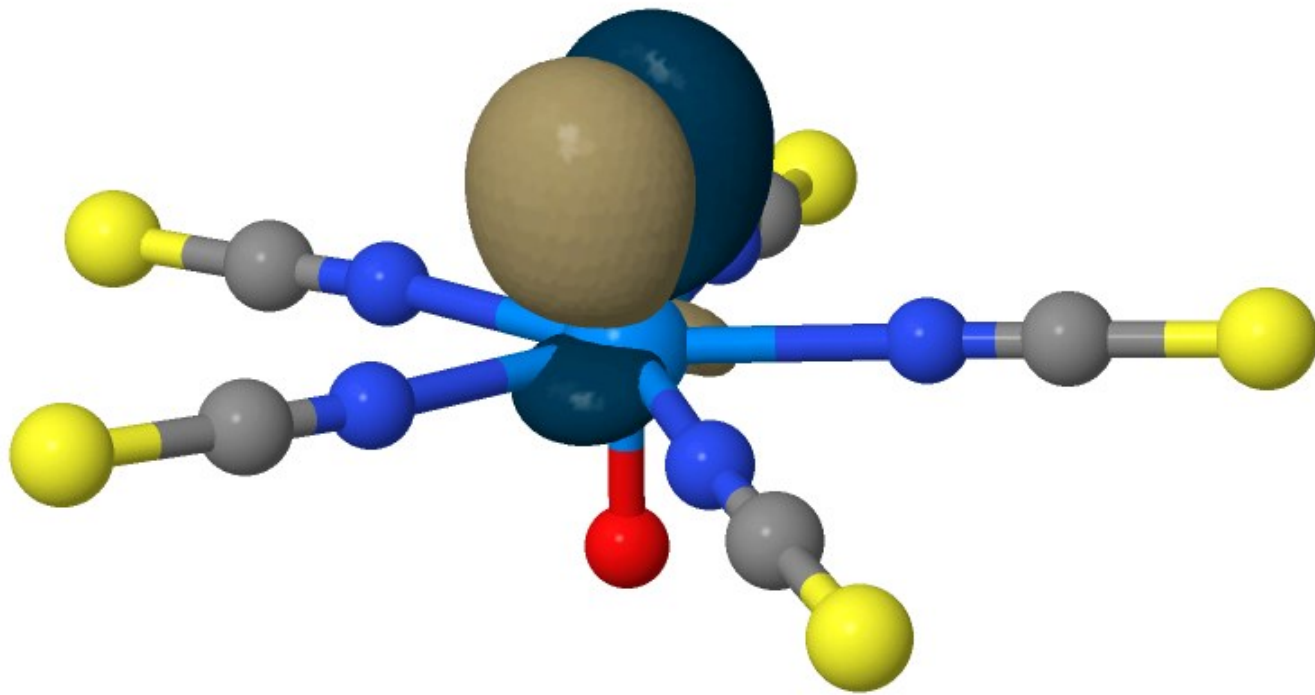

**Figure S28:** Isodensity representation of natural localized molecular orbital (NLMOs) involved in a U=O  $\sigma$ -bonding interaction, common to both Model A and Model B.

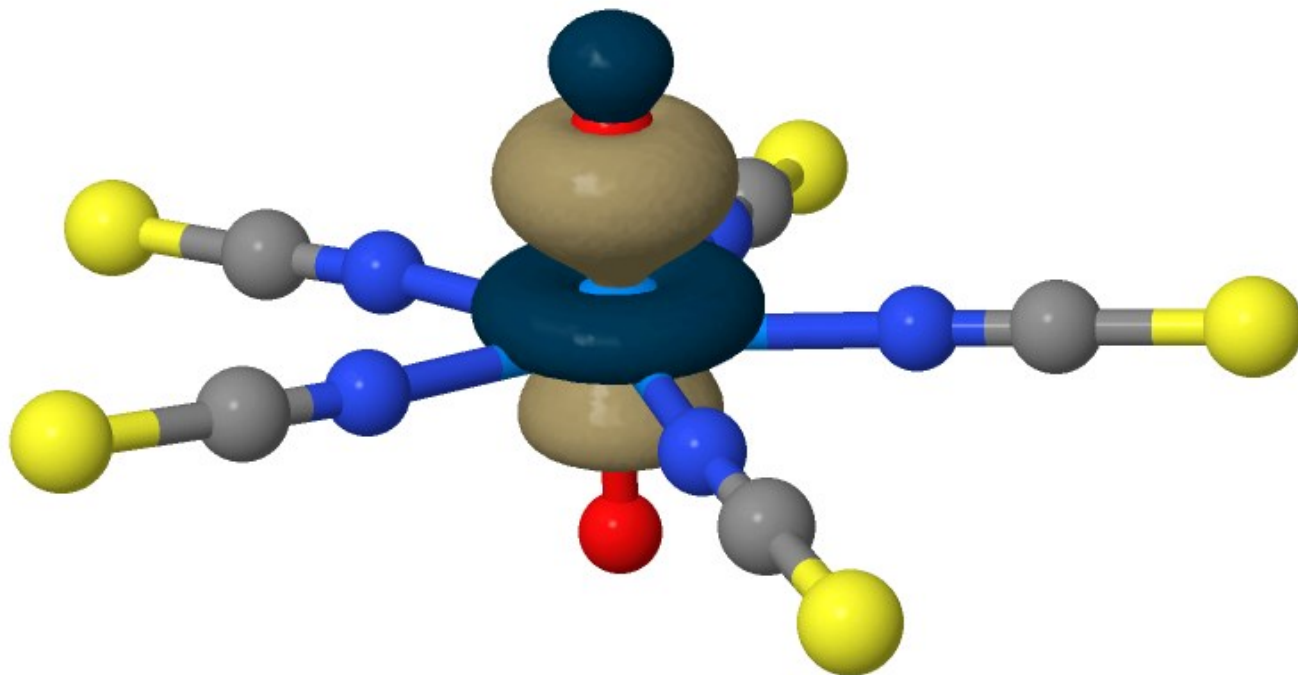

**Table S12:** Stabilization energies of U=O  $\sigma$ - and  $\pi$ - bonding interactions present in  $[\text{UO}_2(\text{NCS})_5]^{3-}$ , Model A, and Model B, derived from SOPT analysis.

| Donor Orbital  | Acceptor Orbital | Stabilization E (kcal/mol)         |         |         |
|----------------|------------------|------------------------------------|---------|---------|
|                |                  | $[\text{UO}_2(\text{NCS})_5]^{3-}$ | Model A | Model B |
| U1-O1 $\pi$    | U1-O2 $\pi^*$    | 2.77                               | 0.75    | 0.83    |
| U1-O1 $\pi$    | U1-O2 $\pi^*$    | -                                  | 1.91    | 0.52    |
| U1-O1 $\pi$    | U1-O2 $\pi^*$    | 2.77                               | 0.74    | 0.53    |
| U1-O1 $\pi$    | U1-O2 $\pi^*$    | -                                  | 1.91    | 0.83    |
| U1-O1 $\sigma$ | U1-O2 $\sigma^*$ | 37.96                              | 37.14   | 17.52   |
| U1-O2 $\pi$    | U1-O1 $\pi^*$    | 2.77                               | 0.76    | 0.81    |
| U1-O2 $\pi$    | U1-O1 $\pi^*$    | -                                  | 1.89    | 0.52    |
| U1-O2 $\pi$    | U1-O1 $\pi^*$    | -                                  | 1.9     | 0.52    |
| U1-O2 $\pi$    | U1-O1 $\pi^*$    | 2.77                               | 0.7     | 0.83    |
| U1-O2 $\sigma$ | U1-O1 $\sigma^*$ | 37.96                              | 37.91   | 18.61   |
| U1-O1 $\sigma$ | U1-O1 $\sigma^*$ | 11.51                              | 10.72   | 5.16    |
| U1-O2 $\sigma$ | U1-O2 $\sigma^*$ | 11.51                              | 10.73   | 5.68    |

**Table S13:** Stabilization energies of S...S interactions in Model A derived from SOPT analysis.

| Donor Orbital | Acceptor orbital   | Stabilization Energy (kcal/mol) |
|---------------|--------------------|---------------------------------|
| LP S1a        | C1b-S1b $\sigma^*$ | 0.12                            |
| LP S1a        | C1b-S1b $\sigma^*$ | 0.21                            |
| LP S1a        | C1b-S1b $\sigma^*$ | 0.24                            |
| LP S1b        | C1b-S1a $\sigma^*$ | 0.12                            |
| LP S1b        | C1b-S1a $\sigma^*$ | 0.21                            |
| LP S1b        | C1b-S1a $\sigma^*$ | 0.24                            |



**Table S14:** Stabilization energies of S $\cdots$ O<sub>y1</sub> interactions in Model B derived from SOPT analysis.

| Donor orbital | Acceptor orbital  | Stabilization Energy (kcal/mol) |
|---------------|-------------------|---------------------------------|
| LP S6         | U1-O2 $\sigma^*$  | 0.13                            |
| LP S6         | U1-O2 $\pi^*$     | 0.04                            |
| LP S6         | U1-O2 $\sigma^*$  | 0.06                            |
| LP O2         | S6-C23 $\sigma^*$ | 0.11                            |

**Figure S29:** Isodensity representation of NLMOs involved in S...S interactions between  $[\text{UO}_2(\text{NCS})_5]^{3-}$  anions, in which (left) S of unit 1 donates a lone pair (LP) electrons ( $e^-$ ) to the S=C  $\sigma^*$  of unit 2 (right).

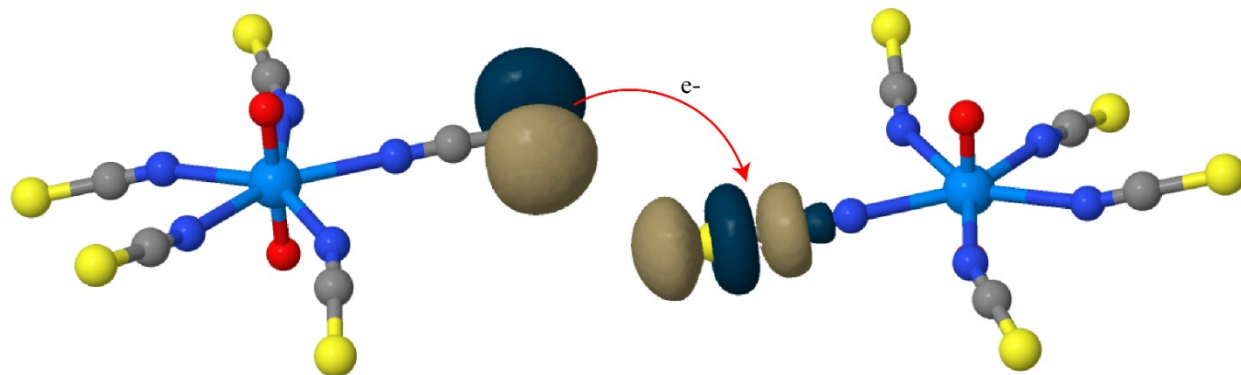

**Figure S30:** Isodensity representation of NLMOs involved in equivalent, yet opposite, S...S interaction between  $[\text{UO}_2(\text{NCS})_5]^{3-}$  anions, in which (left) S of unit 2 donates lone pair (LP) electrons ( $e^-$ ) to the S=C  $\sigma^*$  of unit 1 (right).

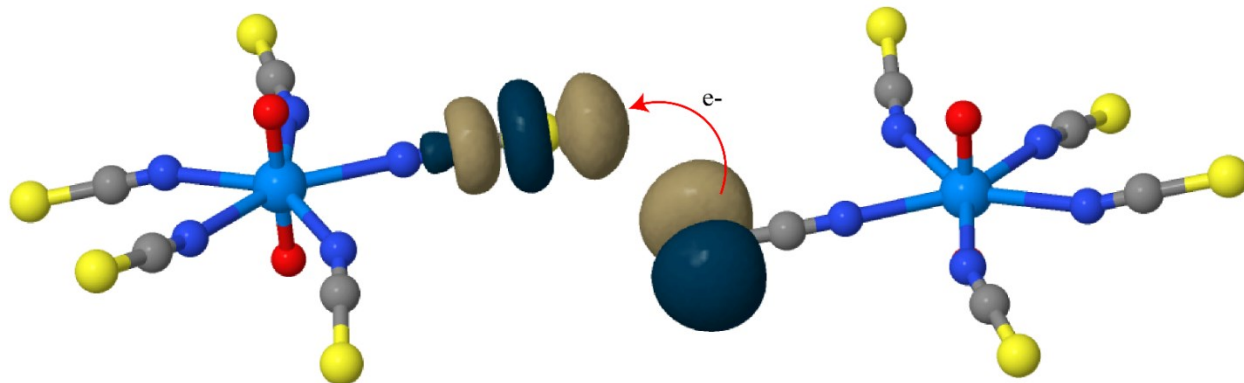

**Figure S31:** Isodensity representation of NLMOs involved in  $S \cdots O_{yl}$  interaction, with S donating LP electrons ( $e^-$ ) to an acceptor  $U=O \sigma^*$  orbital.

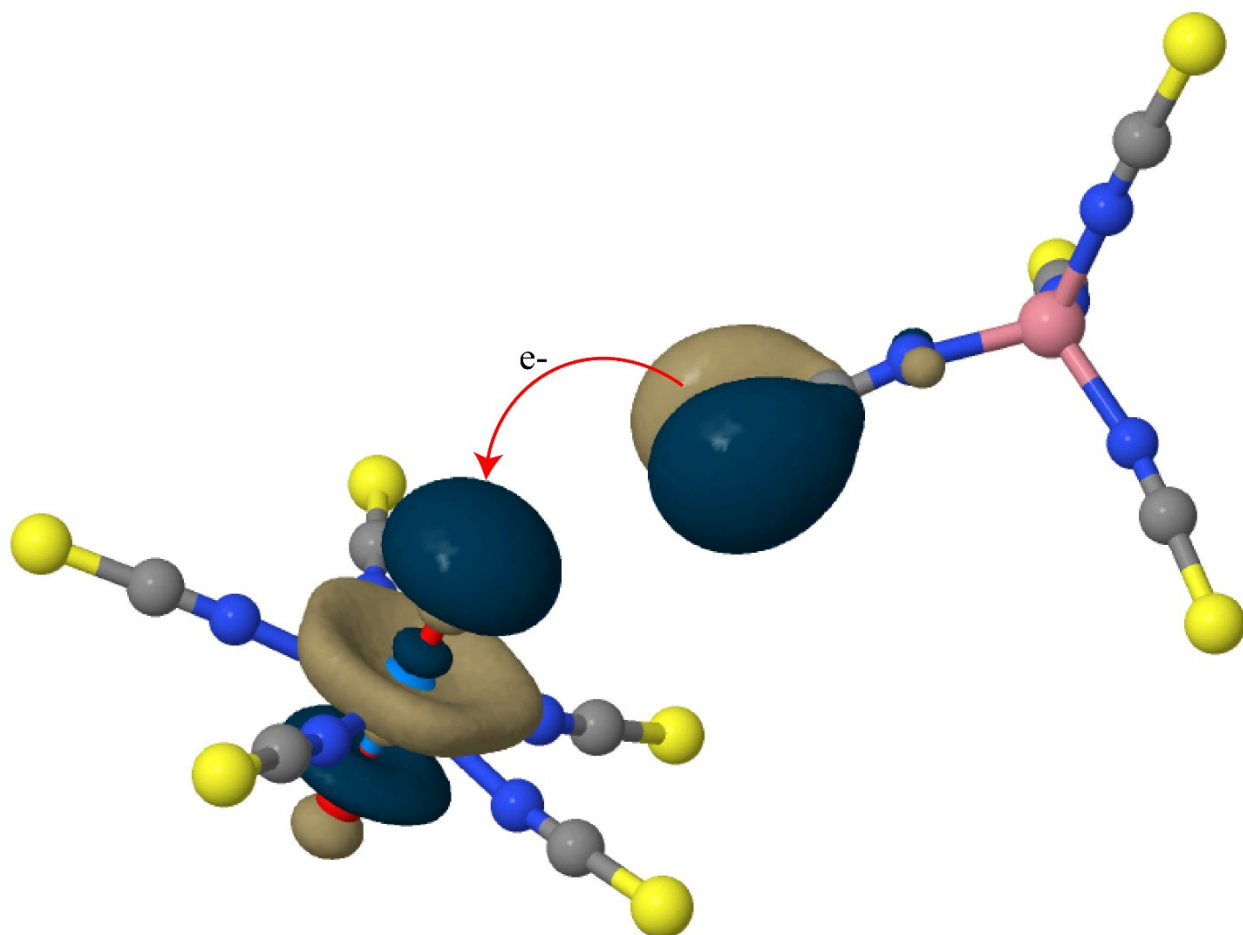

**Figure S32:** Isodensity representation of NLMOs involved in the back donation of the  $S \cdots O_{yl}$  interaction, in which O LP electrons ( $e^-$ ) are donated to a  $C=S \sigma^*$  orbital.

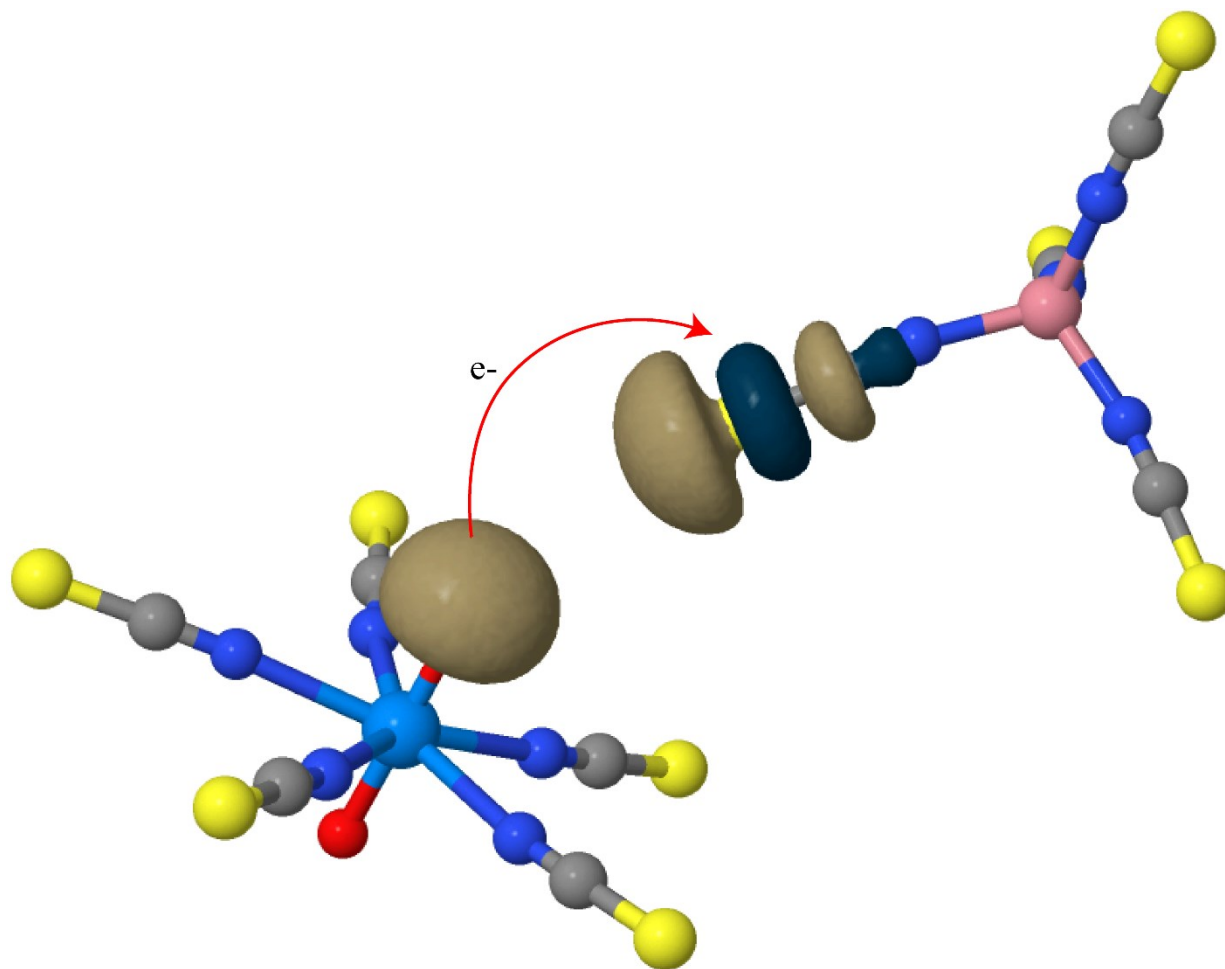

**Table S15:** Parent atom composition of U=O bonds within  $[\text{UO}_2(\text{NCS})_5]^{3-}$ , Model A (with S $\cdots$ S interactions), and Model B (with S $\cdots$ O $_y$ l interactions), derived from NBO analysis.

|                   | $[\text{UO}_2(\text{NCS})_5]^{3-}$ |       | Model A |       | Model B |       |
|-------------------|------------------------------------|-------|---------|-------|---------|-------|
|                   | % U                                | % O   | % U     | % O   | % U     | % O   |
| U-O1 ( $\pi$ )    | 21.34                              | 78.31 | 21.33   | 78.34 | 21.02   | 78.63 |
| U-O1 ( $\pi$ )    | 21.36                              | 78.27 | 21.24   | 78.42 | 21.02   | 78.61 |
| U-O1 ( $\sigma$ ) | 29.31                              | 68.90 | 29.92   | 68.17 | 28.85   | 69.33 |
| U-O2 ( $\pi$ )    | 21.37                              | 78.30 | 21.25   | 78.42 | 21.76   | 77.89 |
| U-O2 ( $\pi$ )    | 21.38                              | 78.29 | 21.37   | 78.28 | 21.68   | 77.99 |
| U-O2 ( $\sigma$ ) | 29.42                              | 68.76 | 29.77   | 68.33 | 29.93   | 68.19 |

**Table S16:** Hybridization of U atomic orbitals involved in  $\sigma$ - and  $\pi$ -bonding interactions of Model A and Model B, derived from NBO analysis.

|   | Model A      |           |           | Model B (O2) |           |           | Model B (O1) |           |           |
|---|--------------|-----------|-----------|--------------|-----------|-----------|--------------|-----------|-----------|
|   | $\sigma$ (%) | $\pi$ (%) | $\pi$ (%) | $\sigma$ (%) | $\pi$ (%) | $\pi$ (%) | $\sigma$ (%) | $\pi$ (%) | $\pi$ (%) |
| s | 0.14         | 0.00      | 0.01      | 0.13         | 0.00      | 0.00      | 0.13         | 0.00      | 0.01      |
| p | 0.29         | 0.08      | 0.09      | 0.30         | 0.09      | 0.09      | 0.23         | 0.06      | 0.06      |
| d | 17.09        | 37.66     | 37.86     | 17.62        | 37.89     | 37.88     | 17.00        | 37.20     | 37.50     |
| f | 82.44        | 62.21     | 62.00     | 81.90        | 61.97     | 61.98     | 82.61        | 62.69     | 62.38     |

**Table S17:** Wiberg bond order analysis of U=O bonds in  $[\text{UO}_2(\text{NCS})_5]^{3-}$ , Model A, and Model B, at the bond critical point.

| <b>Atom(s)</b> | <b><math>[\text{UO}_2(\text{NCS})_5]^{3-}</math></b> | <b>Model A</b> | <b>Model B</b> |
|----------------|------------------------------------------------------|----------------|----------------|
| U=O1           | 2.080                                                | 2.089          | 2.057          |
| U=O2           | 2.080                                                | 2.082          | 2.103          |
| Average U=O    | 2.080                                                | 2.086          | 2.080          |



**Table S18:** Wiberg bond order analysis of U-N bonds in  $[\text{UO}_2(\text{NCS})_5]^{3-}$ , Model A, and Model B.

| <b>Atom(s)</b> | <b><math>[\text{UO}_2(\text{NCS})_5]^{3-}</math></b> | <b>Model A</b> | <b>Model B</b> |
|----------------|------------------------------------------------------|----------------|----------------|
| U-N1           | 0.428                                                | 0.514          | 0.461          |
| U-N2           | 0.428                                                | 0.453          | 0.461          |
| U-N3           | 0.428                                                | 0.421          | 0.427          |
| U-N4           | 0.428                                                | 0.433          | 0.443          |
| U-N5           | 0.428                                                | 0.467          | 0.475          |
| Average U-N    | 0.428                                                | 0.458          | 0.454          |

**Table S19:** Wiberg bond order analysis of all bonds within  $[\text{UO}_2(\text{NCS})_5]^{3-}$  across all models.

| <b>Atom(s)</b> | <b><math>[\text{UO}_2(\text{NCS})_5]^{3-}</math></b> | <b>Model A</b> | <b>Model B</b> |
|----------------|------------------------------------------------------|----------------|----------------|
| U=O1           | 2.080                                                | 2.089          | 2.057          |
| U=O2           | 2.080                                                | 2.082          | 2.103          |
| Average U-O    | 2.080                                                | 2.085          | 2.080          |
| U-N1           | 0.428                                                | 0.514          | 0.461          |
| U-N2           | 0.428                                                | 0.453          | 0.461          |
| U-N3           | 0.428                                                | 0.421          | 0.427          |
| U-N4           | 0.428                                                | 0.433          | 0.443          |
| U-N5           | 0.428                                                | 0.467          | 0.475          |
| Average U-N    | 0.428                                                | 0.458          | 0.454          |
| C-S1           | 1.480                                                | 1.604          | 1.450          |
| C-S2           | 1.480                                                | 1.517          | 1.478          |
| C-S3           | 1.480                                                | 1.413          | 1.505          |
| C-S4           | 1.480                                                | 1.464          | 1.475          |
| C-S5           | 1.480                                                | 1.500          | 1.541          |
| Average C-S    | 1.480                                                | 1.500          | 1.490          |
| C-N1           | 2.457                                                | 2.332          | 2.424          |
| C-N2           | 2.457                                                | 2.420          | 2.397          |
| C-N3           | 2.457                                                | 2.508          | 2.478          |
| C-N4           | 2.457                                                | 2.465          | 2.448          |
| C-N5           | 2.457                                                | 2.425          | 2.462          |
| Average C-N    | 2.457                                                | 2.430          | 2.442          |
| S...S          | -                                                    | 0.007          | -              |
| S...Oyl        | -                                                    | -              | 0.005          |

**Table S20:** Method validation across various functionals for Model A, using Wiberg bond orders as a comparative metric. ( $\sigma = 1.2\text{-}2.4\%$ )

|             | B3LYP | BLYP  | CAM-B3LYP | M062X | TPSSH | Standard Deviation ( $\sigma$ ) |
|-------------|-------|-------|-----------|-------|-------|---------------------------------|
| U=O1        | 2.089 | 2.107 | 2.087     | 2.079 | 2.104 | -                               |
| U=O2        | 2.082 | 2.100 | 2.080     | 2.071 | 2.097 | -                               |
| U=O Average | 2.085 | 2.104 | 2.084     | 2.075 | 2.101 | 0.012                           |
| U-N1        | 0.514 | 0.559 | 0.489     | 0.465 | 0.530 | -                               |
| U-N2        | 0.453 | 0.478 | 0.440     | 0.423 | 0.462 | -                               |
| U-N3        | 0.421 | 0.442 | 0.410     | 0.395 | 0.428 | -                               |
| U-N4        | 0.433 | 0.457 | 0.421     | 0.405 | 0.442 | -                               |
| U-N5        | 0.467 | 0.495 | 0.452     | 0.434 | 0.477 | -                               |
| U-N Average | 0.458 | 0.486 | 0.442     | 0.424 | 0.468 | 0.024                           |

**Table S21:** Method validation across various functionals for Model B, using Wiberg bond orders as a comparative metric. ( $\sigma = 1.2\text{-}2.4\%$ )

|             | B3LYP | BLYP  | CAM-B3LYP | M062X | TPSSH | Standard Deviation ( $\sigma$ ) |
|-------------|-------|-------|-----------|-------|-------|---------------------------------|
| U=O1        | 2.057 | 2.078 | 2.055     | 2.045 | 2.074 | -                               |
| U=O2        | 2.103 | 2.117 | 2.103     | 2.094 | 2.119 | -                               |
| U=O Average | 2.080 | 2.097 | 2.079     | 2.069 | 2.096 | 0.012                           |
| U-N1        | 0.461 | 0.493 | 0.444     | 0.426 | 0.472 | -                               |
| U-N2        | 0.461 | 0.492 | 0.444     | 0.427 | 0.472 | -                               |
| U-N3        | 0.427 | 0.452 | 0.413     | 0.398 | 0.435 | -                               |
| U-N4        | 0.443 | 0.468 | 0.430     | 0.414 | 0.452 | -                               |
| U-N5        | 0.475 | 0.511 | 0.455     | 0.437 | 0.487 | -                               |
| U-N Average | 0.454 | 0.483 | 0.437     | 0.420 | 0.464 | 0.024                           |

## References

1. Rowland, C. E., Kanatzidis, M. G., and Soderholm, L. "Tetraalkylammonium Uranyl Isothiocyanates." *Inorg. Chem.*, 2012, 51, 11798-11804.
